# Supplementary material
Source: HighWire-hosted journal article supplement (doi:10.1101/rna.079925.123)
Supplement: Supplemental_Table_1.xlsx [file Supplemental_Table_1.xlsx]

## Sheet: mdh2_slidingregions_IP.SMI_w50s
regionStartId	chromosome	region_begin	region_end	strand	windows_in_region	padj_min	padj_mean	padj_max	log2FoldChange_min	log2FoldChange_mean	log2FoldChange_max	gene_id	gene_name	gene_type	gene_region	mdh2IP	mdh2SMI
12991:exon0001W00001	chr6	27503743	27503813	+	2	2.32e-05	0.00010572	0.000188265	1.98523	2.09334	2.20145	12991	12991	tRNAscan	exon	55.9684	11.9513
13032:exon0001W00001	chr6	27334989	27335059	-	2	1.1e-159	1.89e-69	3.77e-69	7.97081	8.41838	8.86595	13032	13032	tRNAscan	exon	7638.38	14.4536
13036:exon0001W00001	chr6	27275210	27275260	-	1	0.0063435	0.0063435	0.0063435	2.47812	2.47812	2.47812	13036	13036	tRNAscan	exon	5.66621	0.625286
19697:exon0001W00002	chr1	222465024	222465077	+	2	3.69e-06	1.62e-05	2.87e-05	2.32527	2.44383	2.56238	19697	19697	tRNAscan	exon	169.761	27.8474
20010:exon0001W00001	chr19	45478601	45478651	-	1	0.0451257	0.0451257	0.0451257	1.77459	1.77459	1.77459	20010	20010	tRNAscan	exon	14.8215	3.65161
20271:exon0001W00001	chr17	8119154	8119227	+	3	1.75e-55	1.99e-50	5.96e-50	5.96259	6.97686	7.96164	20271	20271	tRNAscan	exon	6070.36	34.8038
20273:exon0001W00002	chr17	8120944	8121012	+	2	0.000175238	0.00282101	0.00546677	1.56427	1.85647	2.14867	20273	20273	tRNAscan	exon	39.6732	10.157
20274:exon0001W00001	chr17	8125745	8125795	+	1	6.18e-05	6.18e-05	6.18e-05	2.41458	2.41458	2.41458	20274	20274	tRNAscan	exon	34.3339	5.57505
20281:exon0001W00001	chr17	8226609	8226659	-	1	5.08e-10	5.08e-10	5.08e-10	3.76895	3.76895	3.76895	20281	20281	tRNAscan	exon	38.485	2.06298
20648:exon0001W00001	chr1	16872582	16872652	+	2	2.8e-18	1.49e-17	2.71e-17	4.21998	4.25817	4.29635	20648	20648	tRNAscan	exon	423.358	18.1022
21335:exon0001W00002	chr6	26575589	26575639	+	1	0.000125933	0.000125933	0.000125933	2.9254	2.9254	2.9254	21335	21335	tRNAscan	exon	11.1995	0.912707
24590:exon0001W00002	chr11	59551313	59551379	+	2	2.09e-33	0.0158162	0.0316325	1.49147	2.93126	4.37105	24590	24590	tRNAscan	exon	175.83	12.9228
24594:exon0001W00001	chr11	59560334	59560404	-	2	4.34e-49	6.33e-12	1.27e-11	3.30577	4.09749	4.88921	24594	24594	tRNAscan	exon	1366.51	52.9864
25610:exon0001W00001	chr7	149589072	149589122	-	1	0.000456217	0.000456217	0.000456217	2.95553	2.95553	2.95553	25610	25610	tRNAscan	exon	6.96571	0.363833
26992:exon0001W00001	chr16	636735	636785	-	1	8.5e-13	8.5e-13	8.5e-13	3.01865	3.01865	3.01865	26992	26992	tRNAscan	exon	83.2757	9.16996
28108:exon0001W00001	chr13	41455924	41455974	-	1	1.68e-06	1.68e-06	1.68e-06	2.98111	2.98111	2.98111	28108	28108	tRNAscan	exon	30.8727	3.03049
28782:exon0001W00001	chr1	93847572	93847622	+	1	0.000241246	0.000241246	0.000241246	2.06181	2.06181	2.06181	28782	28782	tRNAscan	exon	35.9291	7.9522
34162:exon0001W00002	chr5	181173669	181173722	+	2	2.11e-06	2.11e-06	2.12e-06	2.68596	2.69192	2.69788	34162	34162	tRNAscan	exon	263.623	35.3329
36544:exon0001W00001	chr1	204507029	204507079	-	1	1.16e-06	1.16e-06	1.16e-06	2.21137	2.21137	2.21137	36544	36544	tRNAscan	exon	50.6472	10.3491
ENSG00000004534.14:exon0018W06076	chr3	50061561	50061611	+	1	0.00173379	0.00173379	0.00173379	2.37631	2.37631	2.37631	ENSG00000004534.14	RBM6	protein_coding	exon	8.52999	1.3137
ENSG00000005007.12:exon0001W00003	chr19	18831977	18832027	+	1	0.0223643	0.0223643	0.0223643	1.89383	1.89383	1.89383	ENSG00000005007.12	UPF1	protein_coding	exon	6.16964	1.39428
ENSG00000006118.14:exon0001W00001	chr11	60924462	60924512	+	1	0.0223514	0.0223514	0.0223514	2.016	2.016	2.016	ENSG00000006118.14	TMEM132A	protein_coding	exon	7.05477	1.3137
ENSG00000006744.18:exon0021W00028	chr17	12992930	12992980	-	1	0.0397016	0.0397016	0.0397016	1.87509	1.87509	1.87509	ENSG00000006744.18	ELAC2	protein_coding	exon	6.6884	1.49458
ENSG00000007392.16:exon0007W00199	chr16	192946	192996	-	1	0.0444487	0.0444487	0.0444487	1.75213	1.75213	1.75213	ENSG00000007392.16	LUC7L	protein_coding	exon	7.39981	1.89974
ENSG00000011485.14:exon0009W02170	chr19	46390450	46390520	+	2	0.0223534	0.0277997	0.033246	1.71108	1.72295	1.73483	ENSG00000011485.14	PPP5C	protein_coding	exon	17.2726	4.77305
ENSG00000023839.10:exon0009W00886	chr10	99800465	99800535	+	2	0.0106729	0.0183627	0.0260525	1.8238	1.83519	1.84657	ENSG00000023839.10	ABCC2	protein_coding	exon	20.438	5.10902
ENSG00000023839.10:exon0010W01064	chr10	99804018	99804068	+	1	0.0150508	0.0150508	0.0150508	2.01696	2.01696	2.01696	ENSG00000023839.10	ABCC2	protein_coding	exon	9.652	2.03929
ENSG00000023839.10:exon0015W01439	chr10	99811535	99811585	+	1	0.0248915	0.0248915	0.0248915	1.84909	1.84909	1.84909	ENSG00000023839.10	ABCC2	protein_coding	exon	9.6512	2.4619
ENSG00000025796.13:exon0001W04515	chr6	107958045	107958095	-	1	0.0423092	0.0423092	0.0423092	1.68282	1.68282	1.68282	ENSG00000025796.13	SEC63	protein_coding	exon	9.31172	2.52711
ENSG00000026036.20:exon0015W01414	chr20	63687530	63687580	+	1	0.0173861	0.0173861	0.0173861	2.04419	2.04419	2.04419	ENSG00000026036.20	RTEL1-TNFRSF6B	protein_coding	exon	5.4636	0.989119
ENSG00000047849.21:exon0025W00042	chr3	47851509	47851559	-	1	0.0351274	0.0351274	0.0351274	1.85511	1.85511	1.85511	ENSG00000047849.21	MAP4	protein_coding	exon	8.15984	1.97824
ENSG00000047849.21:exon0025W00051	chr3	47851689	47851759	-	2	0.0137532	0.0283947	0.0430362	1.62663	1.70888	1.79113	ENSG00000047849.21	MAP4	protein_coding	exon	17.7164	4.87543
ENSG00000051523.10:exon0001W00388	chr16	88651015	88651065	-	1	0.0257858	0.0257858	0.0257858	1.37377	1.37377	1.37377	ENSG00000051523.10	CYBA	protein_coding	exon	19.6606	7.25675
ENSG00000064607.16:exon0014W00045	chr19	18991767	18991837	-	2	0.00804531	0.0277165	0.0473876	1.50156	1.81519	2.12882	ENSG00000064607.16	SUGP2	protein_coding	exon	18.3836	4.98901
ENSG00000064607.16:exon0014W00129	chr19	18993447	18993497	-	1	0.0048362	0.0048362	0.0048362	2.34356	2.34356	2.34356	ENSG00000064607.16	SUGP2	protein_coding	exon	8.66426	1.35712
ENSG00000068078.17:exon0001W00003	chr4	1793346	1793436	+	3	0.0425912	0.0439144	0.0447034	1.52282	1.63822	1.75304	ENSG00000068078.17	FGFR3	protein_coding	exon	23.0477	6.37723
ENSG00000068078.17:exon0018W00701	chr4	1807415	1807465	+	1	0.00487203	0.00487203	0.00487203	1.47157	1.47157	1.47157	ENSG00000068078.17	FGFR3	protein_coding	exon	22.5638	7.84487
ENSG00000068400.13:exon0001W01425	chrX	49002227	49002264	-	1	0.0379075	0.0379075	0.0379075	1.77089	1.77089	1.77089	ENSG00000068400.13	GRIPAP1	protein_coding	exon	7.65104	1.97616
ENSG00000068400.13:exon0027W00006	chrX	48973819	48973889	-	2	0.0123332	0.0265352	0.0407371	1.23534	1.47526	1.71519	ENSG00000068400.13	GRIPAP1	protein_coding	exon	35.3151	12.8648
ENSG00000068697.6:exon0001W00947	chr2	20051569	20051619	-	1	0.0180936	0.0180936	0.0180936	1.73941	1.73941	1.73941	ENSG00000068697.6	LAPTM4A	protein_coding	exon	14.8419	4.13735
ENSG00000068878.14:exon0001W05325	chr2	53970762	53970832	-	2	0.00184963	0.00265238	0.00345513	1.91322	1.97332	2.03341	ENSG00000068878.14	PSME4	protein_coding	exon	33.5877	7.44804
ENSG00000069275.12:exon0001W01867	chr1	205750136	205750206	-	2	0.0115581	0.0117428	0.0119276	1.33188	1.39134	1.45079	ENSG00000069275.12	NUCKS1	protein_coding	exon	43.3815	16.0465
ENSG00000070756.13:exon0001W01792	chr8	100721610	100721700	-	3	0.00328128	0.0136437	0.0290216	1.30775	1.46677	1.5756	ENSG00000070756.13	PABPC1	protein_coding	exon	70.264	24.4525
ENSG00000070756.13:exon0001W01803	chr8	100721830	100721940	-	4	0.000157548	0.00710883	0.0188179	1.33792	1.47058	1.73932	ENSG00000070756.13	PABPC1	protein_coding	exon	442.138	157.305
ENSG00000071626.16:exon0001W00008	chr19	1407708	1407758	+	1	0.0280645	0.0280645	0.0280645	1.8959	1.8959	1.8959	ENSG00000071626.16	DAZAP1	protein_coding	exon	8.99098	2.0609
ENSG00000072310.16:exon0005W00438	chr17	17819152	17819202	-	1	0.042364	0.042364	0.042364	1.62801	1.62801	1.62801	ENSG00000072310.16	SREBF1	protein_coding	exon	6.82168	1.93691
ENSG00000072310.16:exon0008W00307	chr17	17816516	17816566	-	1	0.0124399	0.0124399	0.0124399	2.10285	2.10285	2.10285	ENSG00000072310.16	SREBF1	protein_coding	exon	6.34256	1.12866
ENSG00000072501.17:exon0013W01555	chrX	53405244	53405294	-	1	0.0378441	0.0378441	0.0378441	1.62934	1.62934	1.62934	ENSG00000072501.17	SMC1A	protein_coding	exon	8.03554	2.30907
ENSG00000073060.15:exon0004W04346	chr12	124863694	124863744	-	1	0.0387596	0.0387596	0.0387596	1.67905	1.67905	1.67905	ENSG00000073060.15	SCARB1	protein_coding	exon	9.09916	2.56844
ENSG00000074855.10:exon0009W00348	chr19	17330184	17330251	-	2	2.72e-05	6.6e-05	0.0001048	3.5354	3.75855	3.98171	ENSG00000074855.10	ANO8	protein_coding	exon	15.0807	0.180875
ENSG00000075415.12:exon0001W00009	chr12	98593750	98593800	+	1	0.0100979	0.0100979	0.0100979	2.33076	2.33076	2.33076	ENSG00000075415.12	SLC25A3	protein_coding	exon	6.78741	0.987036
ENSG00000075624.13:exon0004W00172	chr7	5530583	5530633	-	1	0.0239957	0.0239957	0.0239957	1.01744	1.01744	1.01744	ENSG00000075624.13	ACTB	protein_coding	exon	89.6166	43.4675
ENSG00000075624.13:exon0005W00135	chr7	5529845	5529915	-	2	0.00363923	0.0202264	0.0368135	1.84416	2.00826	2.17235	ENSG00000075624.13	ACTB	protein_coding	exon	17.3532	3.4419
ENSG00000078369.17:exon0001W05280	chr1	1890939	1890989	-	1	0.043176	0.043176	0.043176	1.30145	1.30145	1.30145	ENSG00000078369.17	GNB1	protein_coding	exon	16.7058	6.37001
ENSG00000078369.17:exon0001W05284	chr1	1891019	1891069	-	1	0.0356399	0.0356399	0.0356399	1.98155	1.98155	1.98155	ENSG00000078369.17	GNB1	protein_coding	exon	7.82036	1.4595
ENSG00000078618.19:exon0001W04471	chr1	51878694	51878744	-	1	0.0193982	0.0193982	0.0193982	1.89365	1.89365	1.89365	ENSG00000078618.19	NRD1	protein_coding	exon	6.76212	1.53591
ENSG00000078808.16:exon0001W00752	chr1	1231911	1231961	-	1	0.038622	0.038622	0.038622	1.45559	1.45559	1.45559	ENSG00000078808.16	SDF4	protein_coding	exon	10.1997	3.43982
ENSG00000080824.18:exon0006W00190	chr14	102084518	102084568	-	1	0.00964662	0.00964662	0.00964662	2.23113	2.23113	2.23113	ENSG00000080824.18	HSP90AA1	protein_coding	exon	8.95035	1.54008
ENSG00000084234.16:exon0001W00004	chr11	130069896	130069986	+	3	0.00244278	0.00941407	0.0216374	1.42951	1.52058	1.59629	ENSG00000084234.16	APLP2	protein_coding	exon	69.1932	23.2254
ENSG00000084234.16:exon0010W02589	chr11	130121633	130121683	+	1	0.0425529	0.0425529	0.0425529	1.54022	1.54022	1.54022	ENSG00000084234.16	APLP2	protein_coding	exon	12.0576	3.8759
ENSG00000084234.16:exon0011W02626	chr11	130122364	130122414	+	1	0.0395816	0.0395816	0.0395816	1.09904	1.09904	1.09904	ENSG00000084234.16	APLP2	protein_coding	exon	25.2397	11.5162
ENSG00000085733.15:exon0013W01529	chr11	70429070	70429160	+	3	0.0217917	0.0377332	0.0470066	1.56948	1.64801	1.76341	ENSG00000085733.15	CTTN	protein_coding	exon	31.5506	9.18949
ENSG00000086758.15:exon0003W07585	chrX	53683913	53683963	-	1	0.00795536	0.00795536	0.00795536	2.31182	2.31182	2.31182	ENSG00000086758.15	HUWE1	protein_coding	exon	8.31304	1.27654
ENSG00000086758.15:exon0003W07590	chrX	53684013	53684063	-	1	0.0235096	0.0235096	0.0235096	1.7961	1.7961	1.7961	ENSG00000086758.15	HUWE1	protein_coding	exon	9.15315	2.34415
ENSG00000086758.15:exon0056W01494	chrX	53562110	53562160	-	1	0.0181119	0.0181119	0.0181119	1.58674	1.58674	1.58674	ENSG00000086758.15	HUWE1	protein_coding	exon	13.7272	4.23765
ENSG00000086758.15:exon0057W01483	chrX	53561875	53561924	-	1	0.0128796	0.0128796	0.0128796	1.85794	1.85794	1.85794	ENSG00000086758.15	HUWE1	protein_coding	exon	8.76766	2.12195
ENSG00000086758.15:exon0086W00040	chrX	53532875	53532925	-	1	0.0386564	0.0386564	0.0386564	1.60565	1.60565	1.60565	ENSG00000086758.15	HUWE1	protein_coding	exon	7.21156	2.12195
ENSG00000087460.23:exon0011W02584	chr20	58891401	58891491	+	3	0.0121208	0.0144396	0.0167483	1.2732	1.36576	1.4779	ENSG00000087460.23	GNAS	protein_coding	exon	57.9907	21.8685
ENSG00000089220.4:exon0001W00013	chr12	118136097	118136187	+	3	7e-05	0.00670671	0.0170951	1.57402	1.69163	1.92601	ENSG00000089220.4	PEBP1	protein_coding	exon	58.877	17.0871
ENSG00000089280.18:exon0006W00239	chr16	31184938	31185028	+	3	0.00661338	0.0263082	0.0398357	1.50085	1.7723	2.05243	ENSG00000089280.18	FUS	protein_coding	exon	32.7633	8.83816
ENSG00000089280.18:exon0010W00503	chr16	31190255	31190325	+	2	0.0169425	0.0309752	0.045008	1.70433	1.76302	1.82172	ENSG00000089280.18	FUS	protein_coding	exon	19.8919	5.35909
ENSG00000089280.18:exon0011W00538	chr16	31190962	31191032	+	2	0.00475177	0.00651097	0.00827017	1.73819	1.84481	1.95144	ENSG00000089280.18	FUS	protein_coding	exon	31.7383	7.87917
ENSG00000090905.17:exon0024W04703	chr16	24823731	24823801	+	2	0.0190677	0.0304834	0.0418991	1.81001	1.93275	2.05549	ENSG00000090905.17	TNRC6A	protein_coding	exon	13.3714	2.93436
ENSG00000090905.17:exon0024W04724	chr16	24824151	24824201	+	1	0.0482168	0.0482168	0.0482168	1.62391	1.62391	1.62391	ENSG00000090905.17	TNRC6A	protein_coding	exon	7.43847	2.1282
ENSG00000092148.12:exon0001W05371	chr14	31207435	31207505	-	2	0.0169363	0.0269188	0.0369014	1.15785	1.25304	1.34822	ENSG00000092148.12	HECTD1	protein_coding	exon	43.9849	17.8966
ENSG00000092148.12:exon0029W01141	chr14	31122913	31122983	-	2	0.00371564	0.00404435	0.00437306	1.85362	1.9472	2.04078	ENSG00000092148.12	HECTD1	protein_coding	exon	36.1709	8.33802
ENSG00000092148.12:exon0030W01070	chr14	31121462	31121532	-	2	0.00102138	0.00683232	0.0126433	1.68123	1.84636	2.01149	ENSG00000092148.12	HECTD1	protein_coding	exon	36.6188	9.50991
ENSG00000094631.18:exon0010W00715	chrX	48815634	48815704	+	2	0.0115422	0.0185607	0.0255791	1.72551	1.83919	1.95288	ENSG00000094631.18	HDAC6	protein_coding	exon	16.6305	4.01336
ENSG00000096384.19:exon0002W00047	chr6	44247086	44247156	+	2	5.72e-05	0.0033187	0.00658022	1.35356	1.55861	1.76367	ENSG00000096384.19	HSP90AB1	protein_coding	exon	58.9469	19.3184
ENSG00000096384.19:exon0008W00206	chr6	44250290	44250480	+	8	3.13e-06	0.0108133	0.0474505	1.12235	1.36224	1.74982	ENSG00000096384.19	HSP90AB1	protein_coding	exon	333.345	127.512
ENSG00000099901.16:exon0002W00079	chr22	20117483	20117553	+	2	0.0104642	0.0281658	0.0458674	1.37135	1.84458	2.31781	ENSG00000099901.16	RANBP1	protein_coding	exon	19.4219	5.56593
ENSG00000100201.18:exon0002W01134	chr22	38506150	38506200	-	1	0.0356351	0.0356351	0.0356351	1.52035	1.52035	1.52035	ENSG00000100201.18	DDX17	protein_coding	exon	12.2735	4.02169
ENSG00000100239.15:exon0023W04885	chr22	50441000	50441050	+	1	0.047441	0.047441	0.047441	1.61306	1.61306	1.61306	ENSG00000100239.15	PPP6R2	protein_coding	exon	9.9331	2.93436
ENSG00000100239.15:exon0024W05016	chr22	50443606	50443656	+	1	0.0118267	0.0118267	0.0118267	2.00951	2.00951	2.00951	ENSG00000100239.15	PPP6R2	protein_coding	exon	7.68072	1.65574
ENSG00000100239.15:exon0024W05019	chr22	50443666	50443756	+	3	0.000858014	0.0159981	0.0422643	1.81393	2.36003	2.92076	ENSG00000100239.15	PPP6R2	protein_coding	exon	24.1337	3.88631
ENSG00000100239.15:exon0024W05024	chr22	50443766	50443836	+	2	0.00129275	0.0100524	0.0188121	1.61201	1.90307	2.19413	ENSG00000100239.15	PPP6R2	protein_coding	exon	21.5861	5.15244
ENSG00000100239.15:exon0025W05053	chr22	50444338	50444388	+	1	0.0326075	0.0326075	0.0326075	1.43676	1.43676	1.43676	ENSG00000100239.15	PPP6R2	protein_coding	exon	10.6642	3.65578
ENSG00000100239.15:exon0025W05061	chr22	50444498	50444548	+	1	0.0347845	0.0347845	0.0347845	1.64871	1.64871	1.64871	ENSG00000100239.15	PPP6R2	protein_coding	exon	8.89098	2.44862
ENSG00000100263.13:exon0002W00402	chr22	29267887	29267937	-	1	0.0419673	0.0419673	0.0419673	1.80809	1.80809	1.80809	ENSG00000100263.13	RHBDD3	protein_coding	exon	5.26099	1.21132
ENSG00000100345.20:exon0037W00371	chr22	36288726	36288776	-	1	0.0191237	0.0191237	0.0191237	1.50063	1.50063	1.50063	ENSG00000100345.20	MYH9	protein_coding	exon	13.3912	4.50535
ENSG00000100345.20:exon0038W00352	chr22	36288351	36288413	-	2	0.0221982	0.0266351	0.031072	1.42387	1.45823	1.49259	ENSG00000100345.20	MYH9	protein_coding	exon	32.5266	11.1865
ENSG00000100650.15:exon0005W02232	chr14	69771533	69771603	+	2	0.0240384	0.0337154	0.0433924	1.37367	1.55098	1.72829	ENSG00000100650.15	SRSF5	protein_coding	exon	18.4737	5.6579
ENSG00000100813.14:exon0020W00037	chr14	23059283	23059333	-	1	0.00417198	0.00417198	0.00417198	2.61524	2.61524	2.61524	ENSG00000100813.14	ACIN1	protein_coding	exon	7.05855	0.808244
ENSG00000100836.10:exon0001W00013	chr14	23321528	23321598	+	2	0.0307503	0.038759	0.0467677	1.34447	1.61993	1.89538	ENSG00000100836.10	PABPN1	protein_coding	exon	18.4641	5.85414
ENSG00000100852.12:exon0004W00055	chr14	32077193	32077303	+	4	7.76e-05	0.0072338	0.0258049	1.57105	2.01385	2.62567	ENSG00000100852.12	ARHGAP5	protein_coding	exon	71.1029	16.1497
ENSG00000100997.18:exon0001W04797	chr20	25390772	25390822	-	1	0.0318348	0.0318348	0.0318348	1.66085	1.66085	1.66085	ENSG00000100997.18	ABHD12	protein_coding	exon	10.1807	2.93436
ENSG00000101076.16:exon0003W02278	chr20	44401269	44401359	+	3	9.88e-05	0.000665953	0.00103001	1.93533	2.0836	2.18064	ENSG00000101076.16	HNF4A	protein_coding	exon	48.8383	9.97326
ENSG00000101194.17:exon0007W00517	chr20	62962963	62963013	+	1	0.00893729	0.00893729	0.00893729	2.04136	2.04136	2.04136	ENSG00000101194.17	SLC17A9	protein_coding	exon	10.1502	2.11987
ENSG00000101194.17:exon0013W00728	chr20	62967222	62967332	+	4	0.00131506	0.018083	0.0294707	1.78239	2.12308	2.98841	ENSG00000101194.17	SLC17A9	protein_coding	exon	31.2273	6.16127
ENSG00000101361.14:exon0001W00025	chr20	2652624	2652674	+	1	0.00718758	0.00718758	0.00718758	2.26617	2.26617	2.26617	ENSG00000101361.14	NOP56	protein_coding	exon	6.27861	0.989119
ENSG00000101361.14:exon0006W00205	chr20	2656236	2656286	+	1	0.0287604	0.0287604	0.0287604	1.60057	1.60057	1.60057	ENSG00000101361.14	NOP56	protein_coding	exon	9.07826	2.62949
ENSG00000101361.14:exon0006W00221	chr20	2656556	2656606	+	1	0.0356399	0.0356399	0.0356399	1.55901	1.55901	1.55901	ENSG00000101361.14	NOP56	protein_coding	exon	12.7397	3.96481
ENSG00000101421.3:exon0005W02110	chr20	33853515	33853645	+	4	0.00141846	0.0187813	0.0407371	1.77469	2.06713	2.36358	ENSG00000101421.3	CHMP4B	protein_coding	exon	35.9878	7.00877
ENSG00000102038.15:exon0020W01114	chrX	129468772	129468842	-	2	0.02502	0.0321513	0.0392826	1.63037	1.79892	1.96747	ENSG00000102038.15	SMARCA1	protein_coding	exon	17.2931	4.58801
ENSG00000102100.14:exon0005W00075	chrX	48904671	48904721	-	1	0.0217316	0.0217316	0.0217316	2.00225	2.00225	2.00225	ENSG00000102100.14	SLC35A2	protein_coding	exon	6.77746	1.35087
ENSG00000103091.14:exon0003W05685	chr16	74985023	74985093	-	2	0.0121897	0.0156527	0.0191158	1.90675	1.96871	2.03067	ENSG00000103091.14	WDR59	protein_coding	exon	15.5453	3.13287
ENSG00000104549.11:exon0001W00003	chr8	124998536	124998586	+	1	0.0367659	0.0367659	0.0367659	1.5774	1.5774	1.5774	ENSG00000104549.11	SQLE	protein_coding	exon	8.47161	2.60561
ENSG00000104695.12:exon0002W01907	chr8	30812619	30812689	-	2	0.0147264	0.0178339	0.0209413	1.87005	1.96873	2.06741	ENSG00000104695.12	PPP2CB	protein_coding	exon	14.0288	2.89303
ENSG00000104824.16:exon0003W00670	chr19	38849699	38849789	-	3	0.00194371	0.0121342	0.0282067	1.61433	1.9911	2.1908	ENSG00000104824.16	HNRNPL	protein_coding	exon	35.5657	7.89551
ENSG00000104824.16:exon0003W00677	chr19	38849839	38849909	-	2	0.009604	0.0290356	0.0484671	1.3707	1.41699	1.46328	ENSG00000104824.16	HNRNPL	protein_coding	exon	42.3272	14.89
ENSG00000104824.16:exon0003W00681	chr19	38849919	38849969	-	1	0.00718883	0.00718883	0.00718883	1.89078	1.89078	1.89078	ENSG00000104824.16	HNRNPL	protein_coding	exon	12.2753	2.97777
ENSG00000104824.16:exon0010W00198	chr19	38840275	38840325	-	1	0.0425378	0.0425378	0.0425378	1.62186	1.62186	1.62186	ENSG00000104824.16	HNRNPL	protein_coding	exon	9.94286	2.97152
ENSG00000104852.14:exon0009W00864	chr19	49102713	49102783	+	2	0.0160259	0.0163176	0.0166094	1.73721	1.796	1.85479	ENSG00000104852.14	SNRNP70	protein_coding	exon	37.7878	9.74142
ENSG00000104852.14:exon0009W00909	chr19	49103613	49103663	+	1	0.0395583	0.0395583	0.0395583	1.50454	1.50454	1.50454	ENSG00000104852.14	SNRNP70	protein_coding	exon	10.2142	3.33119
ENSG00000104852.14:exon0009W00945	chr19	49104333	49104443	+	4	0.00136737	0.00808235	0.0173849	1.98522	2.20225	2.50048	ENSG00000104852.14	SNRNP70	protein_coding	exon	61.462	11.2256
ENSG00000104852.14:exon0009W00953	chr19	49104493	49104563	+	2	0.00260267	0.00664798	0.0106933	1.64793	1.97166	2.2954	ENSG00000104852.14	SNRNP70	protein_coding	exon	27.941	6.65821
ENSG00000104852.14:exon0011W01132	chr19	49108094	49108144	+	1	0.0425912	0.0425912	0.0425912	1.6563	1.6563	1.6563	ENSG00000104852.14	SNRNP70	protein_coding	exon	9.54859	2.66874
ENSG00000104852.14:exon0011W01139	chr19	49108234	49108324	+	3	0.00071334	0.00280821	0.00569195	1.54731	1.70371	2.00351	ENSG00000104852.14	SNRNP70	protein_coding	exon	63.0371	18.5312
ENSG00000104852.14:exon0011W01144	chr19	49108334	49108404	+	2	0.0341695	0.0374533	0.0407371	2.00428	2.04832	2.09236	ENSG00000104852.14	SNRNP70	protein_coding	exon	14.3257	2.87123
ENSG00000105722.9:exon0001W00376	chr19	42255077	42255127	-	1	0.0211597	0.0211597	0.0211597	1.82351	1.82351	1.82351	ENSG00000105722.9	ERF	protein_coding	exon	7.40879	1.83661
ENSG00000105722.9:exon0006W00048	chr19	42248511	42248581	-	2	0.0115693	0.0154348	0.0193002	1.89951	1.94103	1.98255	ENSG00000105722.9	ERF	protein_coding	exon	16.0639	3.34883
ENSG00000105722.9:exon0006W00088	chr19	42249311	42249361	-	1	0.0325208	0.0325208	0.0325208	1.75661	1.75661	1.75661	ENSG00000105722.9	ERF	protein_coding	exon	6.99002	1.64246
ENSG00000106244.12:exon0002W00642	chr7	99404877	99404947	-	2	0.0165231	0.0275725	0.038622	1.55283	1.59362	1.63441	ENSG00000106244.12	PDAP1	protein_coding	exon	22.8415	7.02107
ENSG00000106263.17:exon0002W00037	chr7	2354865	2354995	+	5	0.02313	0.0292366	0.03661	1.41393	1.74234	2.2852	ENSG00000106263.17	EIF3B	protein_coding	exon	61.7398	17.7622
ENSG00000106351.12:exon0001W00004	chr7	100539270	100539340	+	2	0.0321817	0.0332764	0.034371	1.56591	1.65126	1.7366	ENSG00000106351.12	AGFG2	protein_coding	exon	21.9839	6.10856
ENSG00000106443.14:exon0001W00007	chr7	10973991	10974041	+	1	0.0347859	0.0347859	0.0347859	1.63562	1.63562	1.63562	ENSG00000106443.14	PHF14	protein_coding	exon	8.58399	2.48786
ENSG00000107581.12:exon0015W00842	chr10	119050520	119050570	-	1	0.0475434	0.0475434	0.0475434	1.57768	1.57768	1.57768	ENSG00000107581.12	EIF3A	protein_coding	exon	10.7228	3.33119
ENSG00000107581.12:exon0018W00439	chr10	119042453	119042503	-	1	0.0341695	0.0341695	0.0341695	1.93253	1.93253	1.93253	ENSG00000107581.12	EIF3A	protein_coding	exon	7.73032	1.7147
ENSG00000108848.15:exon0001W00005	chr17	50719623	50719713	+	3	0.000873998	0.00191532	0.0032301	2.25983	2.44586	2.73295	ENSG00000108848.15	LUC7L3	protein_coding	exon	29.2668	4.4331
ENSG00000109046.14:exon0008W00874	chr17	27311568	27311616	+	1	0.0492684	0.0492684	0.0492684	1.5972	1.5972	1.5972	ENSG00000109046.14	WSB1	protein_coding	exon	9.07405	2.74723
ENSG00000109113.17:exon0002W00170	chr17	28717652	28717702	-	1	0.0303134	0.0303134	0.0303134	1.3221	1.3221	1.3221	ENSG00000109113.17	RAB34	protein_coding	exon	18.781	7.01085
ENSG00000109814.11:exon0002W01433	chr4	39527392	39527462	-	2	0.0147646	0.0199563	0.0251481	1.38586	1.3871	1.38834	ENSG00000109814.11	UGDH	protein_coding	exon	34.6947	12.5664
ENSG00000110066.14:exon0002W02915	chr11	68213237	68213287	-	1	0.0397016	0.0397016	0.0397016	1.74164	1.74164	1.74164	ENSG00000110066.14	SUV420H1	protein_coding	exon	5.66621	1.3922
ENSG00000110492.15:exon0002W00047	chr11	46381674	46381764	+	3	0.00518272	0.011114	0.0202038	1.23513	1.37883	1.52557	ENSG00000110492.15	MDK	protein_coding	exon	81.8858	30.1102
ENSG00000110492.15:exon0002W00053	chr11	46381794	46381884	+	3	0.00339858	0.0150616	0.0214896	1.78253	1.98733	2.254	ENSG00000110492.15	MDK	protein_coding	exon	31.5229	6.62313
ENSG00000110711.9:exon0006W00393	chr11	67490867	67490917	+	1	0.00278154	0.00278154	0.00278154	2.59285	2.59285	2.59285	ENSG00000110711.9	AIP	protein_coding	exon	6.75773	0.729749
ENSG00000110719.9:exon0006W00209	chr11	68043165	68043235	+	2	0.0206676	0.0337273	0.046787	1.46346	1.53852	1.61358	ENSG00000110719.9	TCIRG1	protein_coding	exon	28.6028	9.06244
ENSG00000110719.9:exon0006W00214	chr11	68043265	68043355	+	3	0.00361933	0.0192067	0.0476574	1.53074	1.63862	1.70095	ENSG00000110719.9	TCIRG1	protein_coding	exon	42.074	12.6117
ENSG00000110719.9:exon0016W00568	chr11	68050376	68050446	+	2	0.00338211	0.00381271	0.0042433	2.294	2.30767	2.32134	ENSG00000110719.9	TCIRG1	protein_coding	exon	18.9137	3.11523
ENSG00000111057.10:exon0002W00016	chr12	52949163	52949213	+	1	0.00792791	0.00792791	0.00792791	1.70113	1.70113	1.70113	ENSG00000111057.10	KRT18	protein_coding	exon	24.246	6.79698
ENSG00000111142.13:exon0001W00032	chr12	95474139	95474209	+	2	0.00329028	0.00997723	0.0166642	2.10599	2.37673	2.64746	ENSG00000111142.13	METAP2	protein_coding	exon	17.6768	2.92603
ENSG00000111642.14:exon0001W01868	chr12	6607339	6607389	-	1	0.0375807	0.0375807	0.0375807	1.70587	1.70587	1.70587	ENSG00000111642.14	CHD4	protein_coding	exon	7.17729	1.85633
ENSG00000111678.10:exon0003W00041	chr12	6943816	6943886	+	2	8.61e-14	1.27e-12	2.45e-12	3.20492	3.37236	3.5398	ENSG00000111678.10	C12orf57	protein_coding	exon	78.6482	6.78221
ENSG00000111885.6:exon0001W08627	chr6	119349721	119349761	-	1	0.0165231	0.0165231	0.0165231	1.67521	1.67521	1.67521	ENSG00000111885.6	MAN1A1	protein_coding	exon	12.2986	3.63606
ENSG00000112715.20:exon0004W00724	chr6	43784708	43784758	+	1	0.0125956	0.0125956	0.0125956	1.98411	1.98411	1.98411	ENSG00000112715.20	VEGFA	protein_coding	exon	7.38448	1.61649
ENSG00000113758.13:exon0009W00512	chr5	177466791	177466841	-	1	0.0415179	0.0415179	0.0415179	1.64215	1.64215	1.64215	ENSG00000113758.13	DBN1	protein_coding	exon	8.31823	2.38132
ENSG00000113966.9:exon0013W01745	chr3	97799443	97799513	+	2	3.36e-09	4.76e-09	6.17e-09	4.51074	4.70042	4.8901	ENSG00000113966.9	ARL6	protein_coding	exon	32.5115	0.182958
ENSG00000114383.9:exon0001W00406	chr3	50328173	50328223	-	1	0.0148065	0.0148065	0.0148065	2.56203	2.56203	2.56203	ENSG00000114383.9	TUSC2	protein_coding	exon	6.64955	0.808244
ENSG00000114867.19:exon0010W00374	chr3	184321933	184322023	+	3	0.0024884	0.0156316	0.0414737	1.47362	1.68767	1.80478	ENSG00000114867.19	EIF4G1	protein_coding	exon	43.2215	12.0827
ENSG00000114867.19:exon0023W00633	chr3	184327215	184327265	+	1	0.0472951	0.0472951	0.0472951	1.24392	1.24392	1.24392	ENSG00000114867.19	EIF4G1	protein_coding	exon	16.5673	6.72759
ENSG00000114867.19:exon0023W00638	chr3	184327315	184327405	+	3	0.00648747	0.0149344	0.0311045	1.81814	1.88348	1.98689	ENSG00000114867.19	EIF4G1	protein_coding	exon	36.0598	8.91457
ENSG00000114867.19:exon0028W01009	chr3	184334786	184334836	+	1	0.0224589	0.0224589	0.0224589	1.74359	1.74359	1.74359	ENSG00000114867.19	EIF4G1	protein_coding	exon	14.151	3.8884
ENSG00000114867.19:exon0028W01012	chr3	184334846	184334956	+	4	0.00113694	0.00971295	0.0277223	1.58953	1.81065	2.03585	ENSG00000114867.19	EIF4G1	protein_coding	exon	71.7576	18.9024
ENSG00000114867.19:exon0028W01021	chr3	184335026	184335096	+	2	0.0388408	0.0427173	0.0465939	1.24833	1.30544	1.36254	ENSG00000114867.19	EIF4G1	protein_coding	exon	31.8297	12.5311
ENSG00000114867.19:exon0028W01031	chr3	184335226	184335276	+	1	0.00387886	0.00387886	0.00387886	1.63531	1.63531	1.63531	ENSG00000114867.19	EIF4G1	protein_coding	exon	19.6795	5.88843
ENSG00000115053.15:exon0002W00541	chr2	231464335	231464405	-	2	0.00739089	0.0100642	0.0127376	1.14284	1.19482	1.24679	ENSG00000115053.15	NCL	protein_coding	exon	60.7222	25.7768
ENSG00000115053.15:exon0002W00546	chr2	231464435	231464525	-	3	0.0038883	0.0176868	0.0439162	1.50413	1.74137	2.03439	ENSG00000115053.15	NCL	protein_coding	exon	48.3132	14.62
ENSG00000115053.15:exon0006W00407	chr2	231461659	231461729	-	2	0.00371564	0.00569782	0.00768	1.35102	1.39681	1.4426	ENSG00000115053.15	NCL	protein_coding	exon	50.136	18.3608
ENSG00000115053.15:exon0007W00357	chr2	231460668	231460778	-	4	0.000609826	0.00772305	0.0127376	1.31166	1.5849	1.78373	ENSG00000115053.15	NCL	protein_coding	exon	120.251	38.6464
ENSG00000115053.15:exon0015W00095	chr2	231455400	231455530	-	5	0.000548494	0.0189821	0.0465233	1.14739	1.46807	1.70673	ENSG00000115053.15	NCL	protein_coding	exon	144.292	50.1924
ENSG00000115216.13:exon0002W00045	chr2	27428657	27428707	+	1	0.0158992	0.0158992	0.0158992	2.06121	2.06121	2.06121	ENSG00000115216.13	NRBP1	protein_coding	exon	6.14533	1.13283
ENSG00000115306.15:exon0005W05120	chr2	54558693	54558743	+	1	0.043176	0.043176	0.043176	1.17188	1.17188	1.17188	ENSG00000115306.15	SPTBN1	protein_coding	exon	18.1083	7.80146
ENSG00000115306.15:exon0019W08739	chr2	54631074	54631164	+	3	0.00248444	0.0168442	0.043176	1.74907	1.88122	1.9538	ENSG00000115306.15	SPTBN1	protein_coding	exon	39.214	9.75789
ENSG00000115306.15:exon0035W10079	chr2	54657849	54657919	+	2	0.00311338	0.0167481	0.0303828	1.7143	1.76176	1.80922	ENSG00000115306.15	SPTBN1	protein_coding	exon	34.1215	9.23499
ENSG00000115306.15:exon0036W10144	chr2	54659153	54659223	+	2	0.0196905	0.02693	0.0341695	1.4037	1.50615	1.6086	ENSG00000115306.15	SPTBN1	protein_coding	exon	31.9513	10.7844
ENSG00000115306.15:exon0041W10620	chr2	54668650	54668740	+	3	0.00417198	0.00832026	0.0131088	1.19828	1.38066	1.61002	ENSG00000115306.15	SPTBN1	protein_coding	exon	60.9383	23.4023
ENSG00000115414.18:exon0001W03768	chr2	215435994	215436084	-	3	0.0296204	0.0367839	0.042074	1.37115	1.42927	1.46121	ENSG00000115414.18	FN1	protein_coding	exon	110.137	39.0561
ENSG00000115504.14:exon0003W01601	chr2	62705821	62705871	+	1	7.54e-05	7.54e-05	7.54e-05	2.91966	2.91966	2.91966	ENSG00000115504.14	EHBP1	protein_coding	exon	8.90992	0.727666
ENSG00000115884.10:exon0002W01212	chr2	20225061	20225111	-	1	0.0395583	0.0395583	0.0395583	1.55343	1.55343	1.55343	ENSG00000115884.10	SDC1	protein_coding	exon	9.35576	2.89094
ENSG00000116017.10:exon0004W00176	chr19	929261	929311	+	1	0.0456441	0.0456441	0.0456441	1.26121	1.26121	1.26121	ENSG00000116017.10	ARID3A	protein_coding	exon	11.2063	4.46194
ENSG00000116017.10:exon0005W00337	chr19	932477	932547	+	2	0.0320761	0.0358172	0.0395583	1.10254	1.23431	1.36608	ENSG00000116017.10	ARID3A	protein_coding	exon	40.4113	17.0126
ENSG00000116133.11:exon0001W01873	chr1	54887148	54887198	-	1	0.018724	0.018724	0.018724	1.55245	1.55245	1.55245	ENSG00000116133.11	DHCR24	protein_coding	exon	13.115	4.13735
ENSG00000116350.15:exon0010W00061	chr1	29148942	29148992	-	1	0.0305765	0.0305765	0.0305765	1.84065	1.84065	1.84065	ENSG00000116350.15	SRSF4	protein_coding	exon	6.63342	1.57099
ENSG00000116560.10:exon0001W00834	chr1	35193041	35193111	-	2	0.0127874	0.0247935	0.0367996	1.30282	1.40122	1.49962	ENSG00000116560.10	SFPQ	protein_coding	exon	34.1955	12.4505
ENSG00000116560.10:exon0007W00584	chr1	35188052	35188090	-	1	0.0322606	0.0322606	0.0322606	1.50119	1.50119	1.50119	ENSG00000116560.10	SFPQ	protein_coding	exon	12.6841	4.16748
ENSG00000117335.18:exon0001W00007	chr1	207752176	207752226	+	1	0.0118607	0.0118607	0.0118607	2.23012	2.23012	2.23012	ENSG00000117335.18	CD46	protein_coding	exon	7.83929	1.35295
ENSG00000117523.15:exon0005W01600	chr1	171517585	171517635	+	1	0.0354687	0.0354687	0.0354687	1.64922	1.64922	1.64922	ENSG00000117523.15	PRRC2C	protein_coding	exon	8.17419	2.38548
ENSG00000117984.12:exon0001W00554	chr11	1763791	1763921	-	5	0.0225734	0.0349499	0.047008	1.00861	1.24761	1.46861	ENSG00000117984.12	CTSD	protein_coding	exon	124.918	53.8689
ENSG00000118137.9:exon0003W00027	chr11	116836270	116836320	-	1	0.0197837	0.0197837	0.0197837	1.2603	1.2603	1.2603	ENSG00000118137.9	APOA1	protein_coding	exon	26.9821	10.8361
ENSG00000118271.9:exon0001W00008	chr18	31591865	31591915	+	1	0.0163965	0.0163965	0.0163965	1.49822	1.49822	1.49822	ENSG00000118271.9	TTR	protein_coding	exon	19.699	6.6273
ENSG00000119335.16:exon0012W00523	chr9	128693955	128694042	+	3	0.00208525	0.011684	0.0252869	1.53407	1.90479	2.42378	ENSG00000119335.16	SET	protein_coding	exon	60.834	16.7454
ENSG00000119383.19:exon0021W01851	chr9	129147986	129148036	+	1	0.0429642	0.0429642	0.0429642	1.43811	1.43811	1.43811	ENSG00000119383.19	PPP2R4	protein_coding	exon	8.21463	2.7514
ENSG00000119777.18:exon0001W00007	chr2	27033029	27033079	+	1	0.0178086	0.0178086	0.0178086	1.79768	1.79768	1.79768	ENSG00000119777.18	TMEM214	protein_coding	exon	7.88871	1.90183
ENSG00000120885.19:exon0001W00889	chr8	27614654	27614744	-	3	0.000482516	0.0025768	0.0048362	1.56713	1.79308	2.09011	ENSG00000120885.19	CLU	protein_coding	exon	112.523	33.0258
ENSG00000120885.19:exon0005W00680	chr8	27610494	27610584	-	3	0.000129695	0.000727179	0.00190621	1.27355	1.3335	1.3861	ENSG00000120885.19	CLU	protein_coding	exon	329.255	127.364
ENSG00000120885.19:exon0011W00066	chr8	27598216	27598250	-	1	0.0244133	0.0244133	0.0244133	1.04862	1.04862	1.04862	ENSG00000120885.19	CLU	protein_coding	exon	35.2746	16.6819
ENSG00000122566.20:exon0001W00540	chr7	26200681	26200791	-	4	0.000591968	0.00448726	0.0135977	1.15171	1.57487	1.98022	ENSG00000122566.20	HNRNPA2B1	protein_coding	exon	125.128	43.9134
ENSG00000122566.20:exon0006W00297	chr7	26195831	26195909	-	3	0.000289263	0.00392389	0.0106372	1.1788	1.35902	1.66321	ENSG00000122566.20	HNRNPA2B1	protein_coding	exon	101.136	39.9416
ENSG00000122566.20:exon0007W00185	chr7	26193594	26193694	-	4	0.00537157	0.0147211	0.0291552	1.10944	1.20864	1.28813	ENSG00000122566.20	HNRNPA2B1	protein_coding	exon	150.998	63.9248
ENSG00000122566.20:exon0008W00168	chr7	26193250	26193300	-	1	0.0356399	0.0356399	0.0356399	1.10396	1.10396	1.10396	ENSG00000122566.20	HNRNPA2B1	protein_coding	exon	30.4914	13.7075
ENSG00000122786.19:exon0010W07360	chr7	134891479	134891569	+	3	0.0019282	0.00303701	0.0040628	2.0561	2.20108	2.32066	ENSG00000122786.19	CALD1	protein_coding	exon	40.5143	7.79104
ENSG00000122786.19:exon0010W07365	chr7	134891579	134891629	+	1	0.0400382	0.0400382	0.0400382	1.56462	1.56462	1.56462	ENSG00000122786.19	CALD1	protein_coding	exon	11.5081	3.53387
ENSG00000122786.19:exon0019W10166	chr7	134947667	134947777	+	4	0.000179311	0.0141041	0.0446478	1.30644	1.50894	1.67341	ENSG00000122786.19	CALD1	protein_coding	exon	88.4444	29.1844
ENSG00000123144.10:exon0001W00188	chr19	12734412	12734462	-	1	0.030165	0.030165	0.030165	1.87508	1.87508	1.87508	ENSG00000123144.10	C19orf43	protein_coding	exon	9.18901	2.0827
ENSG00000123144.10:exon0001W00196	chr19	12734572	12734622	-	1	0.0433924	0.0433924	0.0433924	1.59907	1.59907	1.59907	ENSG00000123144.10	C19orf43	protein_coding	exon	12.6407	3.84082
ENSG00000123384.13:exon0088W04163	chr12	57212156	57212206	+	1	0.0498043	0.0498043	0.0498043	1.90058	1.90058	1.90058	ENSG00000123384.13	LRP1	protein_coding	exon	7.54305	1.71262
ENSG00000124067.16:exon0025W00050	chr16	67944453	67944503	-	1	0.0351274	0.0351274	0.0351274	1.90989	1.90989	1.90989	ENSG00000124067.16	SLC12A4	protein_coding	exon	7.88431	1.72303
ENSG00000124422.11:exon0002W02162	chr17	21042904	21042994	-	3	0.00798206	0.0210713	0.037687	1.69997	1.74141	1.77506	ENSG00000124422.11	USP22	protein_coding	exon	45.3838	12.0164
ENSG00000124942.13:exon0008W04138	chr11	62516304	62516354	-	1	0.0461564	0.0461564	0.0461564	1.75809	1.75809	1.75809	ENSG00000124942.13	AHNAK	protein_coding	exon	8.66487	2.16536
ENSG00000124942.13:exon0008W04166	chr11	62516864	62516914	-	1	0.0475434	0.0475434	0.0475434	1.80026	1.80026	1.80026	ENSG00000124942.13	AHNAK	protein_coding	exon	5.77976	1.35503
ENSG00000125844.15:exon0013W00542	chr20	17624595	17624645	-	1	0.0441249	0.0441249	0.0441249	1.5045	1.5045	1.5045	ENSG00000125844.15	RRBP1	protein_coding	exon	11.647	3.7974
ENSG00000125844.15:exon0018W00351	chr20	17620714	17620807	-	4	1.53e-05	0.00577197	0.018541	1.25136	1.65914	1.93118	ENSG00000125844.15	RRBP1	protein_coding	exon	97.0664	30.7798
ENSG00000125844.15:exon0025W00006	chr20	17613777	17613867	-	3	0.00020704	0.00645578	0.0184297	1.21247	1.25913	1.28766	ENSG00000125844.15	RRBP1	protein_coding	exon	110.214	44.8978
ENSG00000125970.11:exon0011W04169	chr20	34077027	34077097	+	2	0.00518529	0.0113645	0.0175438	1.80815	2.02539	2.24263	ENSG00000125970.11	RALY	protein_coding	exon	25.9442	5.57524
ENSG00000125977.6:exon0001W01192	chr20	34112195	34112265	-	2	0.00501143	0.00627636	0.00754129	1.74245	2.06483	2.3872	ENSG00000125977.6	EIF2S2	protein_coding	exon	22.4202	5.28059
ENSG00000125977.6:exon0004W00511	chr20	34098537	34098587	-	1	0.0491379	0.0491379	0.0491379	1.67526	1.67526	1.67526	ENSG00000125977.6	EIF2S2	protein_coding	exon	8.75691	2.52503
ENSG00000126012.11:exon0001W01689	chrX	53225079	53225149	-	2	0.0195147	0.0324742	0.0454338	1.73358	1.76751	1.80144	ENSG00000126012.11	KDM5C	protein_coding	exon	17.9311	4.6119
ENSG00000126012.11:exon0019W00281	chrX	53196905	53196955	-	1	0.0264004	0.0264004	0.0264004	1.81968	1.81968	1.81968	ENSG00000126012.11	KDM5C	protein_coding	exon	8.51106	2.12195
ENSG00000126012.11:exon0026W00093	chrX	53193160	53193210	-	1	0.0423843	0.0423843	0.0423843	1.74948	1.74948	1.74948	ENSG00000126012.11	KDM5C	protein_coding	exon	6.96492	1.79528
ENSG00000126012.11:exon0026W00096	chrX	53193220	53193310	-	3	0.00274486	0.0149187	0.0343876	1.60134	2.10102	2.77158	ENSG00000126012.11	KDM5C	protein_coding	exon	29.4785	6.67488
ENSG00000127022.14:exon0003W01017	chr5	179698985	179699035	+	1	0.0482168	0.0482168	0.0482168	1.0366	1.0366	1.0366	ENSG00000127022.14	CANX	protein_coding	exon	40.9932	19.6017
ENSG00000127241.16:exon0013W01278	chr3	187242820	187242910	-	3	3.5e-05	0.000137232	0.00033418	3.80632	4.2173	4.43251	ENSG00000127241.16	MASP1	protein_coding	exon	25.4722	0.182958
ENSG00000127481.14:exon0019W05148	chr1	19177700	19177745	-	1	0.0205196	0.0205196	0.0205196	1.84947	1.84947	1.84947	ENSG00000127481.14	UBR4	protein_coding	exon	8.2194	2.02165
ENSG00000127586.16:exon0006W00201	chr16	792044	792094	+	1	0.029144	0.029144	0.029144	1.72444	1.72444	1.72444	ENSG00000127586.16	CHTF18	protein_coding	exon	6.1543	1.61649
ENSG00000129351.17:exon0014W01372	chr19	10681778	10681848	+	2	0.0239957	0.0245702	0.0251447	1.73844	1.77529	1.81215	ENSG00000129351.17	ILF3	protein_coding	exon	16.353	4.08691
ENSG00000129351.17:exon0017W01452	chr19	10683385	10683435	+	1	0.0465233	0.0465233	0.0465233	2.14523	2.14523	2.14523	ENSG00000129351.17	ILF3	protein_coding	exon	6.36228	1.13491
ENSG00000130164.11:exon0020W02141	chr19	11132160	11132250	+	3	0.00155679	0.014268	0.0286041	1.5309	1.65753	1.74661	ENSG00000130164.11	LDLR	protein_coding	exon	42.4272	12.562
ENSG00000130177.14:exon0001W00003	chr13	114234926	114234976	+	1	0.0203123	0.0203123	0.0203123	1.85727	1.85727	1.85727	ENSG00000130177.14	CDC16	protein_coding	exon	6.63342	1.49874
ENSG00000130203.9:exon0002W00043	chr19	44906619	44906689	+	2	0.0170948	0.0319127	0.0467305	1.20752	1.28595	1.36438	ENSG00000130203.9	APOE	protein_coding	exon	91.4756	36.6797
ENSG00000130203.9:exon0004W00141	chr19	44908572	44908622	+	1	0.0211537	0.0211537	0.0211537	1.06275	1.06275	1.06275	ENSG00000130203.9	APOE	protein_coding	exon	43.9335	20.5404
ENSG00000130203.9:exon0004W00144	chr19	44908632	44908682	+	1	0.0419688	0.0419688	0.0419688	1.33496	1.33496	1.33496	ENSG00000130203.9	APOE	protein_coding	exon	36.9851	13.9419
ENSG00000130203.9:exon0004W00153	chr19	44908812	44908942	+	4	0.0141508	0.028097	0.0454338	1.28175	1.44853	1.62595	ENSG00000130203.9	APOE	protein_coding	exon	69.7424	24.6715
ENSG00000130203.9:exon0004W00160	chr19	44908952	44909002	+	1	0.00417198	0.00417198	0.00417198	1.47953	1.47953	1.47953	ENSG00000130203.9	APOE	protein_coding	exon	28.9404	9.94104
ENSG00000130203.9:exon0004W00163	chr19	44909012	44909082	+	2	0.00129029	0.0120275	0.0227646	1.18484	1.27589	1.36694	ENSG00000130203.9	APOE	protein_coding	exon	90.3557	36.3951
ENSG00000130396.20:exon0001W00007	chr6	167827041	167827091	+	1	0.0167733	0.0167733	0.0167733	2.18358	2.18358	2.18358	ENSG00000130396.20	MLLT4	protein_coding	exon	5.75984	0.951954
ENSG00000130396.20:exon0034W06772	chr6	167962432	167962502	+	2	0.00658022	0.0241019	0.0416237	1.68115	1.92646	2.17176	ENSG00000130396.20	MLLT4	protein_coding	exon	14.8835	3.33744
ENSG00000130402.11:exon0001W00001	chr19	38647648	38647798	+	4	0.00934185	0.0255722	0.0499714	1.05907	1.25543	1.51171	ENSG00000130402.11	ACTN4	protein_coding	exon	92.2758	39.5317
ENSG00000130402.11:exon0024W04091	chr19	38729513	38729563	+	1	0.0423695	0.0423695	0.0423695	1.46198	1.46198	1.46198	ENSG00000130402.11	ACTN4	protein_coding	exon	12.6957	4.16748
ENSG00000130706.12:exon0003W00076	chr20	62303597	62303667	+	2	0.0367996	0.0383177	0.0398357	1.62801	1.63838	1.64874	ENSG00000130706.12	ADRM1	protein_coding	exon	22.3531	6.49609
ENSG00000130723.17:exon0014W03839	chr9	131470847	131470897	+	1	0.0223643	0.0223643	0.0223643	1.8451	1.8451	1.8451	ENSG00000130723.17	PRRC2B	protein_coding	exon	5.96703	1.27654
ENSG00000130726.11:exon0002W00021	chr19	58544496	58544546	+	1	0.0288078	0.0288078	0.0288078	1.29035	1.29035	1.29035	ENSG00000130726.11	TRIM28	protein_coding	exon	25.0694	9.7685
ENSG00000130811.10:exon0001W00242	chr19	10119841	10119911	-	2	0.00239872	0.0218165	0.0412342	1.91249	2.11511	2.31772	ENSG00000130811.10	EIF3G	protein_coding	exon	16.3936	2.95199
ENSG00000130829.17:exon0001W00003	chrX	153642531	153642581	+	1	0.0404394	0.0404394	0.0404394	1.76552	1.76552	1.76552	ENSG00000130829.17	DUSP9	protein_coding	exon	5.63652	1.35503
ENSG00000130985.16:exon0003W00153	chrX	47193928	47193998	+	2	0.0235096	0.0236332	0.0237569	1.78801	1.88257	1.97712	ENSG00000130985.16	UBA1	protein_coding	exon	14.9417	3.39432
ENSG00000131051.20:exon0001W01927	chr20	35742140	35742210	-	2	0.0143794	0.0284586	0.0425378	1.69172	1.7273	1.76288	ENSG00000131051.20	RBM39	protein_coding	exon	26.0794	7.20084
ENSG00000131584.18:exon0011W00362	chr1	1299646	1299696	-	1	0.033324	0.033324	0.033324	1.76346	1.76346	1.76346	ENSG00000131584.18	ACAP3	protein_coding	exon	5.62119	1.35712
ENSG00000131626.15:exon0029W04565	chr11	70362094	70362164	+	2	0.0137056	0.0148697	0.0160337	1.96734	2.04727	2.12721	ENSG00000131626.15	PPFIA1	protein_coding	exon	15.5507	3.14823
ENSG00000131871.14:exon0004W00015	chr15	101271096	101271166	-	2	0.00174677	0.00174677	0.00174677	1.96572	1.96572	1.96572	ENSG00000131871.14	VIMP	protein_coding	exon	37.1082	8.49196
ENSG00000132475.8:exon0002W00163	chr17	75779673	75779723	-	1	0.033759	0.033759	0.033759	1.33483	1.33483	1.33483	ENSG00000132475.8	H3F3B	protein_coding	exon	17.6841	6.78429
ENSG00000132510.10:exon0024W00687	chr17	7853689	7853739	+	1	0.00370367	0.00370367	0.00370367	2.17076	2.17076	2.17076	ENSG00000132510.10	KDM6B	protein_coding	exon	9.4199	1.75395
ENSG00000132635.16:exon0005W00188	chr20	2839043	2839082	-	1	0.0321313	0.0321313	0.0321313	1.60322	1.60322	1.60322	ENSG00000132635.16	PCED1A	protein_coding	exon	6.79639	2.01957
ENSG00000132676.15:exon0002W00057	chr1	155689078	155689128	+	1	0.0279316	0.0279316	0.0279316	1.96141	1.96141	1.96141	ENSG00000132676.15	DAP3	protein_coding	exon	5.70047	1.13491
ENSG00000132680.10:exon0001W01065	chr1	155934355	155934400	-	1	0.0250135	0.0250135	0.0250135	1.73868	1.73868	1.73868	ENSG00000132680.10	KIAA0907	protein_coding	exon	8.28873	2.24177
ENSG00000132688.10:exon0004W00057	chr1	156669882	156669952	-	2	0.0172762	0.0324317	0.0475872	1.57388	1.69844	1.82299	ENSG00000132688.10	NES	protein_coding	exon	20.0989	5.62263
ENSG00000132688.10:exon0004W00083	chr1	156670402	156670452	-	1	0.0174763	0.0174763	0.0174763	1.67054	1.67054	1.67054	ENSG00000132688.10	NES	protein_coding	exon	9.72591	2.79065
ENSG00000133065.10:exon0002W01196	chr1	205813027	205813117	-	3	4.48e-07	9.01e-05	0.000269365	3.80769	3.9261	4.00044	ENSG00000133065.10	SLC41A1	protein_coding	exon	35.8372	0.727666
ENSG00000133858.15:exon0002W02705	chr12	71663724	71663774	-	1	0.0245301	0.0245301	0.0245301	1.68402	1.68402	1.68402	ENSG00000133858.15	ZFC3H1	protein_coding	exon	10.8768	3.02424
ENSG00000134287.9:exon0001W01083	chr12	48957349	48957439	-	3	0.00370287	0.016777	0.0363414	1.49423	1.74288	1.97445	ENSG00000134287.9	ARF3	protein_coding	exon	36.3853	9.85533
ENSG00000134824.13:exon0007W01760	chr11	61828240	61828370	+	5	0.00820313	0.0233251	0.0373721	1.24658	1.45551	1.6579	ENSG00000134824.13	FADS2	protein_coding	exon	81.2582	28.961
ENSG00000135486.17:exon0007W00116	chr12	54282572	54282669	+	4	0.0118046	0.0307429	0.0491379	1.06076	1.26979	1.72257	ENSG00000135486.17	HNRNPA1	protein_coding	exon	83.4478	35.4497
ENSG00000135486.17:exon0008W00126	chr12	54282799	54282869	+	2	0.00370287	0.00775371	0.0118046	1.2521	1.35222	1.45233	ENSG00000135486.17	HNRNPA1	protein_coding	exon	46.5585	17.5855
ENSG00000136026.13:exon0004W00503	chr12	106247908	106247978	-	2	0.0313352	0.0313352	0.0313352	1.57699	1.67229	1.76759	ENSG00000136026.13	CKAP4	protein_coding	exon	22.667	6.75129
ENSG00000136156.12:exon0001W00002	chr13	48233177	48233247	+	2	0.00628893	0.0230073	0.0397256	1.12787	1.37816	1.62845	ENSG00000136156.12	ITM2B	protein_coding	exon	50.194	19.6142
ENSG00000136156.12:exon0001W00009	chr13	48233317	48233367	+	1	0.0456441	0.0456441	0.0456441	1.67187	1.67187	1.67187	ENSG00000136156.12	ITM2B	protein_coding	exon	9.50357	2.70799
ENSG00000136450.12:exon0001W00193	chr17	58007206	58007276	-	2	0.0260023	0.0349114	0.0438204	1.478	1.57437	1.67074	ENSG00000136450.12	SRSF1	protein_coding	exon	25.9388	8.01038
ENSG00000136527.17:exon0001W01105	chr3	185937964	185938014	-	1	0.0380134	0.0380134	0.0380134	1.60072	1.60072	1.60072	ENSG00000136527.17	TRA2B	protein_coding	exon	9.28643	2.86914
ENSG00000136938.8:exon0007W01399	chr9	98011350	98011389	+	1	0.0277223	0.0277223	0.0277223	1.97544	1.97544	1.97544	ENSG00000136938.8	ANP32B	protein_coding	exon	8.75252	1.85841
ENSG00000136938.8:exon0008W01453	chr9	98012420	98012472	+	2	0.0425529	0.0454418	0.0483306	1.43805	1.55978	1.68151	ENSG00000136938.8	ANP32B	protein_coding	exon	19.2528	6.10023
ENSG00000136942.14:exon0001W00203	chr9	124861938	124861981	-	1	0.00112126	0.00112126	0.00112126	1.42786	1.42786	1.42786	ENSG00000136942.14	RPL35	protein_coding	exon	35.5408	12.9061
ENSG00000139291.13:exon0001W00016	chr12	71686386	71686476	+	3	4.4e-09	5.2e-09	6.4e-09	3.32659	3.39248	3.4323	ENSG00000139291.13	TMEM19	protein_coding	exon	182.921	13.4482
ENSG00000139318.7:exon0001W00232	chr12	89351899	89351949	-	1	0.0313352	0.0313352	0.0313352	1.93463	1.93463	1.93463	ENSG00000139318.7	DUSP6	protein_coding	exon	5.74011	1.13699
ENSG00000139645.9:exon0028W00037	chr12	56238526	56238596	-	2	0.0057185	0.00876153	0.0118046	1.92118	2.02276	2.12434	ENSG00000139645.9	ANKRD52	protein_coding	exon	17.1813	3.40265
ENSG00000140632.16:exon0001W02199	chr16	4847247	4847297	-	1	0.0160907	0.0160907	0.0160907	1.96712	1.96712	1.96712	ENSG00000140632.16	GLYR1	protein_coding	exon	8.04091	1.79736
ENSG00000140983.13:exon0001W00004	chr16	668145	668195	+	1	0.0327776	0.0327776	0.0327776	1.83149	1.83149	1.83149	ENSG00000140983.13	RHOT2	protein_coding	exon	5.86344	1.27654
ENSG00000141002.18:exon0015W01358	chr16	89900774	89900864	+	3	0.00718758	0.0237693	0.0492095	1.9555	2.2637	2.54299	ENSG00000141002.18	TCF25	protein_coding	exon	19.2104	3.01494
ENSG00000141456.14:exon0015W00120	chr17	4672150	4672200	-	1	0.0446478	0.0446478	0.0446478	1.61222	1.61222	1.61222	ENSG00000141456.14	PELP1	protein_coding	exon	6.78741	1.86258
ENSG00000141756.18:exon0008W00357	chr17	41819889	41819959	+	2	0.0229412	0.0313519	0.0397626	1.9799	1.99072	2.00154	ENSG00000141756.18	FKBP10	protein_coding	exon	12.4482	2.48578
ENSG00000141756.18:exon0008W00384	chr17	41820429	41820499	+	2	0.00351154	0.00807739	0.0126433	1.97849	2.17543	2.37238	ENSG00000141756.18	FKBP10	protein_coding	exon	21.0085	3.88215
ENSG00000141756.18:exon0008W00398	chr17	41820709	41820759	+	1	0.000793997	0.000793997	0.000793997	2.68391	2.68391	2.68391	ENSG00000141756.18	FKBP10	protein_coding	exon	7.44385	0.808244
ENSG00000141867.17:exon0026W00081	chr19	15237118	15237168	-	1	0.0468616	0.0468616	0.0468616	1.46638	1.46638	1.46638	ENSG00000141867.17	BRD4	protein_coding	exon	7.67076	2.52503
ENSG00000142002.16:exon0028W00042	chr19	4676043	4676093	-	1	0.0443412	0.0443412	0.0443412	1.85295	1.85295	1.85295	ENSG00000142002.16	DPP9	protein_coding	exon	8.42799	1.97824
ENSG00000142002.16:exon0028W00057	chr19	4676343	4676393	-	1	0.0119179	0.0119179	0.0119179	2.15295	2.15295	2.15295	ENSG00000142002.16	DPP9	protein_coding	exon	7.44385	1.27862
ENSG00000142192.20:exon0002W14506	chr21	26170703	26170773	-	2	0.0465939	0.0465997	0.0466056	1.47114	1.61756	1.76397	ENSG00000142192.20	APP	protein_coding	exon	25.2264	7.39935
ENSG00000142192.20:exon0010W07071	chr21	26021999	26022042	-	1	0.0420185	0.0420185	0.0420185	1.41703	1.41703	1.41703	ENSG00000142192.20	APP	protein_coding	exon	13.0941	4.64489
ENSG00000142541.16:exon0002W00124	chr19	49490009	49490059	+	1	0.0118046	0.0118046	0.0118046	2.31639	2.31639	2.31639	ENSG00000142541.16	RPL13A	protein_coding	exon	8.79315	1.30954
ENSG00000142657.20:exon0002W00026	chr1	10399083	10399125	+	1	0.0491379	0.0491379	0.0491379	1.19153	1.19153	1.19153	ENSG00000142657.20	PGD	protein_coding	exon	15.3724	6.48984
ENSG00000142798.16:exon0094W00048	chr1	21823184	21823234	-	1	0.0301053	0.0301053	0.0301053	1.89972	1.89972	1.89972	ENSG00000142798.16	HSPG2	protein_coding	exon	6.19932	1.43353
ENSG00000142864.14:exon0001W01125	chr1	67430347	67430397	-	1	0.0173881	0.0173881	0.0173881	1.51202	1.51202	1.51202	ENSG00000142864.14	SERBP1	protein_coding	exon	14.0179	4.68831
ENSG00000143321.18:exon0005W00475	chr1	156751602	156751672	-	2	0.00789265	0.00795122	0.00800979	1.68709	1.7638	1.84051	ENSG00000143321.18	HDGF	protein_coding	exon	32.6434	8.644
ENSG00000143321.18:exon0007W00158	chr1	156745267	156745317	-	1	0.0112851	0.0112851	0.0112851	1.51301	1.51301	1.51301	ENSG00000143321.18	HDGF	protein_coding	exon	15.9702	5.2351
ENSG00000143418.19:exon0001W00705	chr1	150974718	150974848	-	5	0.00311338	0.0154329	0.0286873	1.22278	1.78435	2.14652	ENSG00000143418.19	CERS2	protein_coding	exon	62.3976	18.6973
ENSG00000143418.19:exon0009W00319	chr1	150966955	150967005	-	1	0.00374369	0.00374369	0.00374369	2.32748	2.32748	2.32748	ENSG00000143418.19	CERS2	protein_coding	exon	6.53979	0.947788
ENSG00000143549.19:exon0007W01389	chr1	154183127	154183217	-	3	0.00139395	0.0100711	0.0178149	1.69292	1.75152	1.80531	ENSG00000143549.19	TPM3	protein_coding	exon	53.4805	14.3785
ENSG00000143878.9:exon0001W00001	chr2	20447073	20447143	+	2	0.0151753	0.0221999	0.0292245	2.01555	2.15582	2.29608	ENSG00000143878.9	RHOB	protein_coding	exon	14.9471	2.59024
ENSG00000145041.15:exon0001W05201	chr3	51499912	51499962	-	1	0.00705146	0.00705146	0.00705146	2.42829	2.42829	2.42829	ENSG00000145041.15	VPRBP	protein_coding	exon	6.91153	0.810327
ENSG00000145216.15:exon0001W00005	chr4	53377722	53377772	+	1	0.0342282	0.0342282	0.0342282	1.66325	1.66325	1.66325	ENSG00000145216.15	FIP1L1	protein_coding	exon	10.1554	2.92603
ENSG00000146067.15:exon0001W01680	chr5	177553407	177553457	-	1	0.0106082	0.0106082	0.0106082	2.0878	2.0878	2.0878	ENSG00000146067.15	FAM193B	protein_coding	exon	7.46278	1.4377
ENSG00000146830.9:exon0022W00030	chr7	100680086	100680196	-	4	9.11e-06	0.00148248	0.00287657	1.61734	2.14349	2.7001	ENSG00000146830.9	GIGYF1	protein_coding	exon	89.0921	21.4103
ENSG00000146830.9:exon0022W00089	chr7	100681266	100681376	-	4	0.000978665	0.0199775	0.0430029	1.61693	1.988	2.44992	ENSG00000146830.9	GIGYF1	protein_coding	exon	44.0879	10.1642
ENSG00000146830.9:exon0022W00099	chr7	100681466	100681536	-	2	0.00411596	0.0118887	0.0196615	1.5997	1.70918	1.81866	ENSG00000146830.9	GIGYF1	protein_coding	exon	24.9083	7.19778
ENSG00000148400.9:exon0034W00082	chr9	136496063	136496153	-	3	8e-06	2.41e-05	3.22e-05	4.1029	4.26369	4.58526	ENSG00000148400.9	NOTCH1	protein_coding	exon	31.6867	0.365916
ENSG00000149809.14:exon0001W00001	chr11	65111844	65111914	+	2	6.86e-10	7.42e-10	7.98e-10	4.89103	5.05562	5.2202	ENSG00000149809.14	TM7SF2	protein_coding	exon	47.9362	0.546791
ENSG00000149925.16:exon0006W00636	chr16	30065787	30065837	+	1	0.0289332	0.0289332	0.0289332	1.39291	1.39291	1.39291	ENSG00000149925.16	ALDOA	protein_coding	exon	17.5551	6.33285
ENSG00000152102.17:exon0001W02277	chr2	131093393	131093443	-	1	0.0296204	0.0296204	0.0296204	1.86581	1.86581	1.86581	ENSG00000152102.17	FAM168B	protein_coding	exon	6.12999	1.43561
ENSG00000152518.6:exon0001W00210	chr2	43226564	43226609	-	1	0.0206711	0.0206711	0.0206711	2.067	2.067	2.067	ENSG00000152518.6	ZFP36L2	protein_coding	exon	7.00975	1.35503
ENSG00000152795.17:exon0001W00343	chr4	82429387	82429457	-	2	0.0186856	0.030406	0.0421263	1.67532	1.74668	1.81805	ENSG00000152795.17	HNRNPDL	protein_coding	exon	20.5135	5.60726
ENSG00000152818.18:exon0012W07519	chr6	144436014	144436064	+	1	0.0115989	0.0115989	0.0115989	2.18494	2.18494	2.18494	ENSG00000152818.18	UTRN	protein_coding	exon	7.33946	1.35087
ENSG00000152818.18:exon0028W09711	chr6	144479931	144479981	+	1	0.0154313	0.0154313	0.0154313	1.87361	1.87361	1.87361	ENSG00000152818.18	UTRN	protein_coding	exon	8.02119	1.94316
ENSG00000152818.18:exon0030W09986	chr6	144485424	144485474	+	1	0.011013	0.011013	0.011013	2.21032	2.21032	2.21032	ENSG00000152818.18	UTRN	protein_coding	exon	8.35707	1.53383
ENSG00000152818.18:exon0035W10383	chr6	144493400	144493450	+	1	0.0400382	0.0400382	0.0400382	1.73986	1.73986	1.73986	ENSG00000152818.18	UTRN	protein_coding	exon	8.0168	2.03512
ENSG00000153187.16:exon0001W00633	chr1	244863816	244863926	-	4	0.00567015	0.0175469	0.0278183	1.0718	1.2381	1.443	ENSG00000153187.16	HNRNPU	protein_coding	exon	107.492	45.0025
ENSG00000153187.16:exon0001W00640	chr1	244863956	244864006	-	1	0.0196232	0.0196232	0.0196232	1.57726	1.57726	1.57726	ENSG00000153187.16	HNRNPU	protein_coding	exon	13.6784	4.24181
ENSG00000153187.16:exon0001W00663	chr1	244864416	244864506	-	3	0.0165513	0.0331256	0.0455282	1.16199	1.27862	1.4073	ENSG00000153187.16	HNRNPU	protein_coding	exon	56.641	22.704
ENSG00000153560.11:exon0003W02595	chr3	33440215	33440285	-	2	0.00226624	0.00241944	0.00257264	2.40832	2.47978	2.55124	ENSG00000153560.11	UBP1	protein_coding	exon	13.9396	1.71678
ENSG00000153989.7:exon0001W00003	chr6	117675541	117675591	+	1	0.0233393	0.0233393	0.0233393	1.87221	1.87221	1.87221	ENSG00000153989.7	NUS1	protein_coding	exon	6.60991	1.39845
ENSG00000154277.12:exon0005W00046	chr4	41257274	41257324	+	1	0.0404394	0.0404394	0.0404394	1.5553	1.5553	1.5553	ENSG00000154277.12	UCHL1	protein_coding	exon	10.5409	3.21136
ENSG00000154277.12:exon0005W00054	chr4	41257434	41257524	+	3	0.00325871	0.0155846	0.0354973	1.71863	1.8637	2.00398	ENSG00000154277.12	UCHL1	protein_coding	exon	45.8359	10.9085
ENSG00000156030.12:exon0016W00168	chr14	73718461	73718511	-	1	0.0420185	0.0420185	0.0420185	1.86814	1.86814	1.86814	ENSG00000156030.12	ELMSAN1	protein_coding	exon	6.06066	1.43353
ENSG00000156508.17:exon0003W00243	chr6	73520602	73520672	-	2	4.78e-05	0.000119372	0.000190945	1.77612	1.84986	1.9236	ENSG00000156508.17	EEF1A1	protein_coding	exon	55.1777	14.5436
ENSG00000156508.17:exon0003W00253	chr6	73520802	73520852	-	1	0.0277223	0.0277223	0.0277223	1.75348	1.75348	1.75348	ENSG00000156508.17	EEF1A1	protein_coding	exon	9.72591	2.60144
ENSG00000156599.10:exon0014W01620	chr11	57700145	57700195	+	1	0.0439867	0.0439867	0.0439867	1.91075	1.91075	1.91075	ENSG00000156599.10	ZDHHC5	protein_coding	exon	6.43161	1.43353
ENSG00000157014.10:exon0001W00026	chr3	10248522	10248572	+	1	0.00878558	0.00878558	0.00878558	2.35041	2.35041	2.35041	ENSG00000157014.10	TATDN2	protein_coding	exon	6.00209	0.849575
ENSG00000158874.11:exon0001W00043	chr1	161223117	161223227	-	3	0.0166776	0.0197358	0.0230152	1.47731	1.66325	1.84344	ENSG00000158874.11	APOA2	protein_coding	exon	33.2918	10.0474
ENSG00000158874.11:exon0001W00061	chr1	161223477	161223527	-	1	0.0251235	0.0251235	0.0251235	1.41485	1.41485	1.41485	ENSG00000158874.11	APOA2	protein_coding	exon	17.8708	6.3596
ENSG00000159335.15:exon0002W00052	chr12	6766534	6766604	+	2	0.00837541	0.0166977	0.02502	1.50392	1.68842	1.87293	ENSG00000159335.15	PTMS	protein_coding	exon	35.1047	10.1043
ENSG00000159335.15:exon0004W00205	chr12	6769602	6769672	+	2	0.0126009	0.0132457	0.0138906	1.36931	1.39364	1.41798	ENSG00000159335.15	PTMS	protein_coding	exon	56.3688	20.4971
ENSG00000159335.15:exon0005W00219	chr12	6769883	6769999	+	5	0.00554717	0.0243546	0.0381455	1.0775	1.29981	1.74956	ENSG00000159335.15	PTMS	protein_coding	exon	140.123	57.5328
ENSG00000159579.13:exon0003W00935	chr16	57204843	57204933	+	3	3.7e-11	6.38e-11	8.61e-11	4.17544	4.25214	4.38015	ENSG00000159579.13	RSPRY1	protein_coding	exon	86.0767	3.25061
ENSG00000159692.15:exon0002W01882	chr4	1249075	1249125	-	1	0.00355217	0.00355217	0.00355217	2.47815	2.47815	2.47815	ENSG00000159692.15	CTBP1	protein_coding	exon	6.38758	0.768996
ENSG00000160014.16:exon0002W00011	chr19	46601275	46601325	+	1	0.0438179	0.0438179	0.0438179	1.57317	1.57317	1.57317	ENSG00000160014.16	CALM3	protein_coding	exon	16.0294	5.0345
ENSG00000160679.12:exon0001W00004	chr1	153634041	153634091	+	1	0.029941	0.029941	0.029941	1.54742	1.54742	1.54742	ENSG00000160679.12	CHTOP	protein_coding	exon	12.0116	3.8429
ENSG00000160867.14:exon0019W00552	chr5	177097886	177097936	+	1	0.0429755	0.0429755	0.0429755	1.30214	1.30214	1.30214	ENSG00000160867.14	FGFR4	protein_coding	exon	16.0045	6.22838
ENSG00000162337.11:exon0001W00002	chr11	68312628	68312678	+	1	0.0367659	0.0367659	0.0367659	1.6664	1.6664	1.6664	ENSG00000162337.11	LRP5	protein_coding	exon	7.00437	1.90183
ENSG00000163993.6:exon0001W00040	chr4	6693848	6693898	+	1	0.0122109	0.0122109	0.0122109	1.67432	1.67432	1.67432	ENSG00000163993.6	S100P	protein_coding	exon	15.5652	4.4991
ENSG00000164050.12:exon0004W01018	chr3	48424224	48424294	-	2	0.0166703	0.0254179	0.0341656	1.83286	1.87045	1.90805	ENSG00000164050.12	PLXNB1	protein_coding	exon	15.7766	3.66411
ENSG00000164050.12:exon0012W00784	chr3	48419523	48419573	-	1	0.0385886	0.0385886	0.0385886	1.81474	1.81474	1.81474	ENSG00000164050.12	PLXNB1	protein_coding	exon	6.30371	1.39845
ENSG00000164050.12:exon0026W00358	chr3	48410994	48411036	-	1	0.0242545	0.0242545	0.0242545	1.89023	1.89023	1.89023	ENSG00000164050.12	PLXNB1	protein_coding	exon	7.59246	1.75812
ENSG00000164111.14:exon0001W01447	chr4	121696900	121696990	-	3	0.000393442	0.0136941	0.0379075	1.66903	2.12116	2.48265	ENSG00000164111.14	ANXA5	protein_coding	exon	30.734	6.26763
ENSG00000164889.12:exon0003W00122	chr7	151059629	151059719	+	3	0.00136805	0.00805646	0.0193002	1.87982	1.98613	2.16864	ENSG00000164889.12	SLC4A2	protein_coding	exon	32.4487	7.09976
ENSG00000164896.19:exon0001W00172	chr7	151080021	151080091	-	2	0.0108981	0.0110712	0.0112442	1.94236	2.01814	2.09392	ENSG00000164896.19	FASTK	protein_coding	exon	16.2097	3.41385
ENSG00000164896.19:exon0001W00199	chr7	151080561	151080691	-	4	0.00682076	0.0126177	0.0248915	1.65546	1.76556	1.91445	ENSG00000164896.19	FASTK	protein_coding	exon	47.9883	12.621
ENSG00000164896.19:exon0002W00049	chr7	151077552	151077642	-	3	0.0109972	0.0187946	0.032649	1.78225	2.14922	2.50517	ENSG00000164896.19	FASTK	protein_coding	exon	25.0453	4.69664
ENSG00000165175.15:exon0003W00206	chrX	38805542	38805612	+	2	0.000154529	0.000156038	0.000157548	1.7829	1.78542	1.78793	ENSG00000165175.15	MID1IP1	protein_coding	exon	51.9332	14.0867
ENSG00000165733.7:exon0010W00699	chr10	42796753	42796803	+	1	0.0298581	0.0298581	0.0298581	2.13295	2.13295	2.13295	ENSG00000165733.7	BMS1	protein_coding	exon	5.62656	0.954037
ENSG00000166275.15:exon0005W00440	chr10	102863012	102863062	+	1	0.0179762	0.0179762	0.0179762	1.94777	1.94777	1.94777	ENSG00000166275.15	C10orf32	protein_coding	exon	7.05397	1.53591
ENSG00000166598.12:exon0001W00014	chr12	103930366	103930496	+	5	0.000527575	0.00769581	0.0299745	1.46432	1.95467	2.46984	ENSG00000166598.12	HSP90B1	protein_coding	exon	323.308	84.3827
ENSG00000166598.12:exon0007W00413	chr12	103938317	103938459	+	6	0.0023348	0.0152401	0.047008	1.41925	1.55873	1.75805	ENSG00000166598.12	HSP90B1	protein_coding	exon	290.19	93.6167
ENSG00000166598.12:exon0011W00632	chr12	103942726	103942816	+	3	0.0111062	0.0152781	0.0221	1.36885	1.42469	1.47644	ENSG00000166598.12	HSP90B1	protein_coding	exon	81.8464	29.0549
ENSG00000166598.12:exon0015W00861	chr12	103947310	103947430	+	5	0.00437306	0.0217158	0.0430856	1.27471	1.41014	1.53303	ENSG00000166598.12	HSP90B1	protein_coding	exon	233.078	83.5543
ENSG00000167004.12:exon0001W00009	chr15	43746551	43746601	+	1	0.0350011	0.0350011	0.0350011	1.54587	1.54587	1.54587	ENSG00000167004.12	PDIA3	protein_coding	exon	15.3277	4.73686
ENSG00000167258.13:exon0001W00001	chr17	39461510	39461560	+	1	0.037163	0.037163	0.037163	1.57533	1.57533	1.57533	ENSG00000167258.13	CDK12	protein_coding	exon	10.7722	3.37044
ENSG00000167460.14:exon0005W00474	chr19	16076465	16076515	+	1	0.0491379	0.0491379	0.0491379	1.61882	1.61882	1.61882	ENSG00000167460.14	TPM4	protein_coding	exon	9.10813	2.7514
ENSG00000167470.12:exon0002W00067	chr19	1249887	1249957	+	2	0.0169425	0.023009	0.0290755	1.62177	1.66297	1.70416	ENSG00000167470.12	MIDN	protein_coding	exon	19.2996	5.57921
ENSG00000167491.17:exon0009W03982	chr19	19465439	19465489	+	1	0.0291268	0.0291268	0.0291268	1.58512	1.58512	1.58512	ENSG00000167491.17	GATAD2A	protein_coding	exon	8.97046	2.74932
ENSG00000167508.10:exon0014W00025	chr16	88652414	88652464	-	1	0.037241	0.037241	0.037241	1.62088	1.62088	1.62088	ENSG00000167508.10	MVD	protein_coding	exon	15.2441	4.5116
ENSG00000167548.14:exon0012W01559	chr12	49050281	49050331	-	1	0.00188093	0.00188093	0.00188093	2.87127	2.87127	2.87127	ENSG00000167548.14	KMT2D	protein_coding	exon	5.48791	0.405163
ENSG00000167548.14:exon0031W01106	chr12	49041203	49041253	-	1	0.032649	0.032649	0.032649	1.65819	1.65819	1.65819	ENSG00000167548.14	KMT2D	protein_coding	exon	7.06393	1.8605
ENSG00000167685.14:exon0003W00437	chr19	56141286	56141336	+	1	0.00919841	0.00919841	0.00919841	1.93117	1.93117	1.93117	ENSG00000167685.14	ZNF444	protein_coding	exon	7.06294	1.57724
ENSG00000167685.14:exon0010W01400	chr19	56160563	56160613	+	1	0.0113829	0.0113829	0.0113829	2.10446	2.10446	2.10446	ENSG00000167685.14	ZNF444	protein_coding	exon	8.0706	1.53799
ENSG00000167685.14:exon0010W01405	chr19	56160663	56160733	+	2	0.0308188	0.0338092	0.0367996	1.61923	1.63951	1.65978	ENSG00000167685.14	ZNF444	protein_coding	exon	18.5631	5.2114
ENSG00000167792.11:exon0004W00179	chr11	67610420	67610490	+	2	0.00414753	0.00576921	0.00739089	1.19051	1.21829	1.24607	ENSG00000167792.11	NDUFV1	protein_coding	exon	81.093	34.1744
ENSG00000167792.11:exon0004W00187	chr11	67610580	67610690	+	3	0.0101581	0.0191439	0.0358159	1.35316	1.95473	2.62385	ENSG00000167792.11	NDUFV1	protein_coding	exon	30.2449	8.47016
ENSG00000167792.11:exon0004W00202	chr11	67610880	67610950	+	2	0.026437	0.0371682	0.0478993	1.80259	1.89185	1.98111	ENSG00000167792.11	NDUFV1	protein_coding	exon	15.0652	3.39432
ENSG00000167792.11:exon0004W00222	chr11	67611280	67611330	+	1	0.0264004	0.0264004	0.0264004	1.81504	1.81504	1.81504	ENSG00000167792.11	NDUFV1	protein_coding	exon	7.49246	1.7602
ENSG00000167792.11:exon0004W00264	chr11	67612120	67612190	+	2	0.00510538	0.0101959	0.0152864	1.07577	1.07841	1.08105	ENSG00000167792.11	NDUFV1	protein_coding	exon	76.1233	35.4156
ENSG00000167978.16:exon0001W00016	chr16	2752628	2752738	+	4	0.000957499	0.0102348	0.0232969	1.78779	2.19348	2.58145	ENSG00000167978.16	SRRM2	protein_coding	exon	39.4519	7.59481
ENSG00000167978.16:exon0007W00380	chr16	2759908	2759978	+	2	0.0085237	0.0264144	0.0443052	1.53058	1.74039	1.9502	ENSG00000167978.16	SRRM2	protein_coding	exon	21.7923	6.07426
ENSG00000167978.16:exon0007W00394	chr16	2760188	2760238	+	1	0.00908293	0.00908293	0.00908293	1.89188	1.89188	1.89188	ENSG00000167978.16	SRRM2	protein_coding	exon	9.77452	2.30074
ENSG00000167978.16:exon0008W00489	chr16	2762080	2762130	+	1	0.0278183	0.0278183	0.0278183	1.31912	1.31912	1.31912	ENSG00000167978.16	SRRM2	protein_coding	exon	17.0357	6.54255
ENSG00000167978.16:exon0008W00715	chr16	2766600	2766670	+	2	0.0223643	0.0271153	0.0318663	2.1978	2.23719	2.27659	ENSG00000167978.16	SRRM2	protein_coding	exon	12.206	1.98032
ENSG00000167978.16:exon0009W00824	chr16	2768784	2768834	+	1	0.0121818	0.0121818	0.0121818	1.92001	1.92001	1.92001	ENSG00000167978.16	SRRM2	protein_coding	exon	10.8573	2.56636
ENSG00000167978.16:exon0009W00898	chr16	2770264	2770334	+	2	0.00632247	0.0145111	0.0226997	1.76014	1.78239	1.80464	ENSG00000167978.16	SRRM2	protein_coding	exon	27.3789	7.12651
ENSG00000167978.16:exon0011W00936	chr16	2771017	2771167	+	6	1.7e-05	0.0120427	0.0445307	1.35318	1.67384	2.52718	ENSG00000167978.16	SRRM2	protein_coding	exon	119.49	37.0715
ENSG00000168137.15:exon0029W03654	chr3	9470838	9470888	+	1	0.0430029	0.0430029	0.0430029	1.93618	1.93618	1.93618	ENSG00000168137.15	SETD5	protein_coding	exon	6.53081	1.39428
ENSG00000168137.15:exon0032W03998	chr3	9477702	9477772	+	2	0.025954	0.0307299	0.0355058	1.28233	1.28712	1.2919	ENSG00000168137.15	SETD5	protein_coding	exon	44.9257	17.7105
ENSG00000168488.18:exon0020W00657	chr16	28836172	28836282	+	4	0.00763587	0.0231894	0.0455215	1.50475	1.93495	2.2371	ENSG00000168488.18	ATXN2L	protein_coding	exon	38.7387	9.20694
ENSG00000168488.18:exon0020W00694	chr16	28836912	28836962	+	1	0.027724	0.027724	0.027724	1.64987	1.64987	1.64987	ENSG00000168488.18	ATXN2L	protein_coding	exon	10.1259	2.96736
ENSG00000168615.11:exon0001W00006	chr8	38996968	38997058	+	3	0.00846965	0.0221491	0.0384631	1.56305	1.67897	1.83125	ENSG00000168615.11	ADAM9	protein_coding	exon	44.0741	12.6995
ENSG00000169045.17:exon0003W00469	chr5	179623508	179623598	-	3	0.00524985	0.0109647	0.0147646	1.36124	1.4826	1.63097	ENSG00000169045.17	HNRNPH1	protein_coding	exon	56.0286	19.483
ENSG00000169045.17:exon0006W00199	chr5	179618143	179618193	-	1	0.0377486	0.0377486	0.0377486	1.30451	1.30451	1.30451	ENSG00000169045.17	HNRNPH1	protein_coding	exon	23.7115	9.39406
ENSG00000169710.6:exon0042W00062	chr17	82079556	82079606	-	1	0.0385273	0.0385273	0.0385273	1.1605	1.1605	1.1605	ENSG00000169710.6	FASN	protein_coding	exon	24.718	10.6987
ENSG00000170144.18:exon0006W00205	chr2	177216695	177216771	+	3	0.000298701	0.00105341	0.00242872	1.85631	2.23415	2.46871	ENSG00000170144.18	HNRNPA3	protein_coding	exon	39.2845	7.49145
ENSG00000170144.18:exon0007W00213	chr2	177216859	177216929	+	2	0.00541897	0.014764	0.0241091	1.76334	1.88584	2.00835	ENSG00000170144.18	HNRNPA3	protein_coding	exon	16.073	3.8211
ENSG00000170315.13:exon0001W00014	chr17	16381057	16381107	+	1	0.0122579	0.0122579	0.0122579	1.37686	1.37686	1.37686	ENSG00000170315.13	UBB	protein_coding	exon	18.745	6.87964
ENSG00000170421.11:exon0009W00131	chr12	52899774	52899824	-	1	0.0287873	0.0287873	0.0287873	1.37576	1.37576	1.37576	ENSG00000170421.11	KRT8	protein_coding	exon	23.4448	8.4186
ENSG00000171456.16:exon0016W03816	chr20	32434651	32434701	+	1	0.0301463	0.0301463	0.0301463	2.01977	2.01977	2.01977	ENSG00000171456.16	ASXL1	protein_coding	exon	5.95707	1.17208
ENSG00000171603.16:exon0019W00067	chr1	9730345	9730395	-	1	0.0214153	0.0214153	0.0214153	1.97986	1.97986	1.97986	ENSG00000171603.16	CLSTN1	protein_coding	exon	6.68382	1.35087
ENSG00000172613.7:exon0005W03705	chr11	67391957	67392007	+	1	0.000882632	0.000882632	0.000882632	2.87364	2.87364	2.87364	ENSG00000172613.7	RAD9A	protein_coding	exon	6.88563	0.546791
ENSG00000172939.8:exon0001W00023	chr3	38165528	38165578	+	1	0.00778365	0.00778365	0.00778365	2.11931	2.11931	2.11931	ENSG00000172939.8	OXSR1	protein_coding	exon	6.49556	1.12866
ENSG00000173020.10:exon0014W00939	chr11	67285146	67285188	+	1	0.047312	0.047312	0.047312	1.54367	1.54367	1.54367	ENSG00000173020.10	ADRBK1	protein_coding	exon	8.29751	2.60769
ENSG00000173020.10:exon0015W00946	chr11	67285285	67285335	+	1	0.0197837	0.0197837	0.0197837	1.94899	1.94899	1.94899	ENSG00000173020.10	ADRBK1	protein_coding	exon	7.36555	1.53799
ENSG00000173020.10:exon0015W00957	chr11	67285505	67285615	+	4	8.05e-07	0.00570739	0.018216	1.09877	1.49655	1.83907	ENSG00000173020.10	ADRBK1	protein_coding	exon	164.616	60.0885
ENSG00000173020.10:exon0015W00981	chr11	67285985	67286055	+	2	0.0195147	0.0206153	0.0217159	1.35043	1.38427	1.41811	ENSG00000173020.10	ADRBK1	protein_coding	exon	35.2133	13.0428
ENSG00000173020.10:exon0015W00986	chr11	67286085	67286135	+	1	0.0444579	0.0444579	0.0444579	1.24363	1.24363	1.24363	ENSG00000173020.10	ADRBK1	protein_coding	exon	18.543	7.49243
ENSG00000173120.14:exon0001W00001	chr11	67119268	67119338	+	2	0.0210156	0.0216492	0.0222827	1.58807	1.62246	1.65686	ENSG00000173120.14	KDM2A	protein_coding	exon	27.206	8.20037
ENSG00000173120.14:exon0001W00010	chr11	67119448	67119558	+	4	0.00319735	0.0173105	0.0367265	1.42741	1.65389	1.74168	ENSG00000173120.14	KDM2A	protein_coding	exon	57.0339	16.8402
ENSG00000173120.14:exon0001W00016	chr11	67119568	67119638	+	2	0.0255412	0.0277868	0.0300324	1.59679	1.79445	1.9921	ENSG00000173120.14	KDM2A	protein_coding	exon	19.9228	5.27018
ENSG00000173120.14:exon0001W00027	chr11	67119788	67119838	+	1	0.0333127	0.0333127	0.0333127	1.84524	1.84524	1.84524	ENSG00000173120.14	KDM2A	protein_coding	exon	6.74777	1.45533
ENSG00000173120.14:exon0015W05614	chr11	67231565	67231615	+	1	0.0019282	0.0019282	0.0019282	1.72984	1.72984	1.72984	ENSG00000173120.14	KDM2A	protein_coding	exon	16.9574	4.71011
ENSG00000173120.14:exon0023W06564	chr11	67250605	67250675	+	2	0.0271262	0.0291153	0.0311045	1.25361	1.26886	1.28411	ENSG00000173120.14	KDM2A	protein_coding	exon	38.0643	15.0254
ENSG00000173120.14:exon0027W06891	chr11	67257113	67257203	+	3	0.00529666	0.0207091	0.0444487	1.31162	1.79155	2.12072	ENSG00000173120.14	KDM2A	protein_coding	exon	45.2864	14.5351
ENSG00000173120.14:exon0027W06896	chr11	67257213	67257303	+	3	0.00665749	0.0218881	0.0321313	1.11555	1.23927	1.34883	ENSG00000173120.14	KDM2A	protein_coding	exon	64.9939	26.8948
ENSG00000173327.7:exon0001W00818	chr11	65614080	65614130	-	1	0.00820313	0.00820313	0.00820313	2.18065	2.18065	2.18065	ENSG00000173327.7	MAP3K11	protein_coding	exon	6.90078	1.21549
ENSG00000173473.10:exon0011W06275	chr3	47710722	47710772	-	1	0.0155731	0.0155731	0.0155731	1.79592	1.79592	1.79592	ENSG00000173473.10	SMARCC1	protein_coding	exon	9.77013	2.56636
ENSG00000173599.13:exon0024W00108	chr11	66850379	66850464	-	3	0.0107668	0.017406	0.0296204	1.16431	1.33197	1.53172	ENSG00000173599.13	PC	protein_coding	exon	86.2627	33.7129
ENSG00000173674.10:exon0001W00864	chrX	20141784	20141834	-	1	0.0138336	0.0138336	0.0138336	2.09602	2.09602	2.09602	ENSG00000173674.10	EIF1AX	protein_coding	exon	6.50094	1.21132
ENSG00000173898.11:exon0022W00445	chr11	66694198	66694248	-	1	0.0439867	0.0439867	0.0439867	1.79865	1.79865	1.79865	ENSG00000173898.11	SPTBN2	protein_coding	exon	5.08807	1.16999
ENSG00000174437.16:exon0002W00042	chr12	110281575	110281625	+	1	0.0305367	0.0305367	0.0305367	1.58611	1.58611	1.58611	ENSG00000174437.16	ATP2A2	protein_coding	exon	9.10355	2.74932
ENSG00000174744.13:exon0003W00240	chr11	66342088	66342198	-	4	0.00169911	0.0130926	0.0303828	1.26572	1.49379	1.90408	ENSG00000174744.13	BRMS1	protein_coding	exon	89.1758	32.0827
ENSG00000175130.6:exon0001W00118	chr1	32336186	32336236	-	1	0.0477239	0.0477239	0.0477239	1.43155	1.43155	1.43155	ENSG00000175130.6	MARCKSL1	protein_coding	exon	9.12347	3.07182
ENSG00000175634.14:exon0001W00007	chr11	67428579	67428649	+	2	0.000530149	0.000762355	0.000994561	2.03261	2.17676	2.32091	ENSG00000175634.14	RPS6KB2	protein_coding	exon	28.5713	5.59893
ENSG00000175756.13:exon0001W00070	chr1	1375099	1375169	-	2	0.00479443	0.0108768	0.0169592	1.6835	1.82914	1.97478	ENSG00000175756.13	AURKAIP1	protein_coding	exon	25.0601	6.16127
ENSG00000177189.12:exon0002W05842	chrX	20266763	20266833	-	2	0.00170948	0.0104793	0.0192491	1.67181	2.03845	2.40508	ENSG00000177189.12	RPS6KA3	protein_coding	exon	20.06	4.45777
ENSG00000177885.13:exon0010W00050	chr17	75319055	75319105	-	1	0.0390627	0.0390627	0.0390627	1.84676	1.84676	1.84676	ENSG00000177885.13	GRB2	protein_coding	exon	5.86344	1.27237
ENSG00000178252.17:exon0005W00266	chr3	49012400	49012470	+	2	0.0258274	0.0277239	0.0296204	1.8787	1.98052	2.08234	ENSG00000178252.17	WDR6	protein_coding	exon	15.6451	3.16587
ENSG00000178252.17:exon0005W00302	chr3	49013120	49013210	+	3	0.00874826	0.0156378	0.0227347	1.70682	1.89369	2.05014	ENSG00000178252.17	WDR6	protein_coding	exon	34.8149	8.37292
ENSG00000178252.17:exon0005W00323	chr3	49013540	49013590	+	1	0.0270518	0.0270518	0.0270518	1.63431	1.63431	1.63431	ENSG00000178252.17	WDR6	protein_coding	exon	9.33065	2.74515
ENSG00000178950.16:exon0025W00858	chr4	866383	866433	-	1	0.0486225	0.0486225	0.0486225	1.69749	1.69749	1.69749	ENSG00000178950.16	GAK	protein_coding	exon	6.56947	1.7602
ENSG00000178971.13:exon0020W00089	chr17	8226580	8226670	-	3	1.38e-09	1.02e-08	2.77e-08	3.42883	3.65445	3.76895	ENSG00000178971.13	CTC1	protein_coding	exon	108.727	6.41115
ENSG00000181163.13:exon0005W00280	chr5	171392709	171392759	+	1	0.0435145	0.0435145	0.0435145	1.40635	1.40635	1.40635	ENSG00000181163.13	NPM1	protein_coding	exon	23.4241	8.17589
ENSG00000181163.13:exon0005W00290	chr5	171392909	171392978	+	2	0.0222287	0.0297946	0.0373605	1.36674	1.48243	1.59811	ENSG00000181163.13	NPM1	protein_coding	exon	29.6983	10.4091
ENSG00000182087.12:exon0007W00022	chr19	1010067	1010157	-	2	0.0274947	0.0367216	0.0459485	1.92706	1.94039	1.95372	ENSG00000182087.12	TMEM259	protein_coding	exon	18.5675	3.96578
ENSG00000182196.13:exon0001W00033	chr12	122980699	122980749	+	1	0.0253677	0.0253677	0.0253677	1.72583	1.72583	1.72583	ENSG00000182196.13	ARL6IP4	protein_coding	exon	6.69279	1.71678
ENSG00000182446.13:exon0002W04008	chr17	81637035	81637085	-	1	0.0355183	0.0355183	0.0355183	1.93552	1.93552	1.93552	ENSG00000182446.13	NPLOC4	protein_coding	exon	6.40193	1.39637
ENSG00000182944.17:exon0010W01035	chr22	29288685	29288795	+	4	0.00512282	0.0202239	0.0318221	1.21931	1.54255	1.904	ENSG00000182944.17	EWSR1	protein_coding	exon	71.0782	24.6458
ENSG00000182944.17:exon0014W01584	chr22	29299672	29299782	+	4	0.0113729	0.0264737	0.0434862	1.31807	1.3538	1.43252	ENSG00000182944.17	EWSR1	protein_coding	exon	70.6252	26.4153
ENSG00000183010.16:exon0004W00227	chr17	81936907	81936957	-	1	0.0166093	0.0166093	0.0166093	1.9028	1.9028	1.9028	ENSG00000183010.16	PYCR1	protein_coding	exon	7.43408	1.69498
ENSG00000183010.16:exon0004W00241	chr17	81937187	81937237	-	1	0.00325392	0.00325392	0.00325392	2.00371	2.00371	2.00371	ENSG00000183010.16	PYCR1	protein_coding	exon	14.5693	3.19373
ENSG00000184110.14:exon0012W01727	chr16	28723174	28723224	+	1	0.00840848	0.00840848	0.00840848	2.28048	2.28048	2.28048	ENSG00000184110.14	EIF3C	protein_coding	exon	7.16733	1.21132
ENSG00000184640.17:exon0018W06086	chr17	77402318	77402408	+	3	2.11e-08	2.59e-06	7.61e-06	2.97758	3.43947	3.89796	ENSG00000184640.17	2023-09-09	protein_coding	exon	75.6888	5.63401
ENSG00000184840.11:exon0003W00177	chr5	177595686	177595736	+	1	0.000992683	0.000992683	0.000992683	1.4542	1.4542	1.4542	ENSG00000184840.11	TMED9	protein_coding	exon	28.8633	10.1456
ENSG00000185324.21:exon0011W00657	chr16	89693873	89693943	+	2	0.0128796	0.0220562	0.0312329	1.77411	1.79594	1.81776	ENSG00000185324.21	CDK10	protein_coding	exon	15.8712	3.87382
ENSG00000185324.21:exon0011W00664	chr16	89694013	89694103	+	3	0.0115862	0.0279056	0.0385886	1.66829	1.73491	1.80769	ENSG00000185324.21	CDK10	protein_coding	exon	26.3365	7.07587
ENSG00000185324.21:exon0015W00768	chr16	89696094	89696144	+	1	0.0425976	0.0425976	0.0425976	1.81692	1.81692	1.81692	ENSG00000185324.21	CDK10	protein_coding	exon	6.03178	1.35087
ENSG00000185624.14:exon0001W00864	chr17	81860406	81860476	-	2	0.00739471	0.0172033	0.0270118	1.20574	1.3127	1.41965	ENSG00000185624.14	P4HB	protein_coding	exon	107.194	42.0013
ENSG00000185624.14:exon0001W00868	chr17	81860486	81860576	-	3	0.000102083	0.00470383	0.0136834	1.31085	1.70463	2.09027	ENSG00000185624.14	P4HB	protein_coding	exon	74.239	23.0386
ENSG00000185787.14:exon0004W03123	chr15	78872935	78872985	+	1	0.0275781	0.0275781	0.0275781	1.51141	1.51141	1.51141	ENSG00000185787.14	MORF4L1	protein_coding	exon	16.1721	5.19169
ENSG00000185813.10:exon0008W00266	chr17	81906281	81906351	-	2	0.0230841	0.0277198	0.0323554	1.82037	1.86694	1.91351	ENSG00000185813.10	PCYT2	protein_coding	exon	14.4494	3.25894
ENSG00000185818.7:exon0003W00366	chr4	2066839	2066889	+	1	0.0456441	0.0456441	0.0456441	1.44353	1.44353	1.44353	ENSG00000185818.7	NAT8L	protein_coding	exon	6.60911	2.20253
ENSG00000185896.10:exon0001W00001	chr13	113297240	113297290	+	1	0.0343338	0.0343338	0.0343338	1.83658	1.83658	1.83658	ENSG00000185896.10	LAMP1	protein_coding	exon	7.89787	1.93899
ENSG00000186298.11:exon0001W01157	chr12	110742832	110742902	-	2	0.00487203	0.0223173	0.0397626	1.24971	1.55829	1.86688	ENSG00000186298.11	PPP1CC	protein_coding	exon	36.1901	12.6551
ENSG00000186575.17:exon0001W00006	chr22	29603655	29603705	+	1	0.0430856	0.0430856	0.0430856	1.86748	1.86748	1.86748	ENSG00000186575.17	NF2	protein_coding	exon	5.93276	1.39428
ENSG00000187109.13:exon0009W00975	chr12	76056112	76056162	-	1	0.0179762	0.0179762	0.0179762	1.45619	1.45619	1.45619	ENSG00000187109.13	NAP1L1	protein_coding	exon	19.7722	6.78864
ENSG00000187514.14:exon0003W00083	chr2	231708528	231708598	+	2	0.0113466	0.019931	0.0285154	1.12509	1.20146	1.27783	ENSG00000187514.14	PTMA	protein_coding	exon	65.1313	27.51
ENSG00000187514.14:exon0003W00089	chr2	231708648	231708698	+	1	0.0363414	0.0363414	0.0363414	1.21282	1.21282	1.21282	ENSG00000187514.14	PTMA	protein_coding	exon	26.773	11.0885
ENSG00000187514.14:exon0006W00250	chr2	231711910	231711980	+	2	0.0031662	0.00343494	0.00370367	1.67987	1.71062	1.74137	ENSG00000187514.14	PTMA	protein_coding	exon	64.295	18.4971
ENSG00000187514.14:exon0008W00295	chr2	231712803	231712853	+	1	0.0392826	0.0392826	0.0392826	1.57696	1.57696	1.57696	ENSG00000187514.14	PTMA	protein_coding	exon	17.6497	5.4698
ENSG00000187741.14:exon0005W03542	chr16	89808313	89808363	-	1	0.0167803	0.0167803	0.0167803	2.14949	2.14949	2.14949	ENSG00000187741.14	FANCA	protein_coding	exon	5.66083	0.987036
ENSG00000188157.13:exon0038W01744	chr1	1055063	1055113	+	1	0.0326905	0.0326905	0.0326905	1.56261	1.56261	1.56261	ENSG00000188157.13	AGRN	protein_coding	exon	12.513	3.79532
ENSG00000188486.3:exon0001W00072	chr11	119095273	119095323	-	1	0.028323	0.028323	0.028323	1.58126	1.58126	1.58126	ENSG00000188486.3	H2AFX	protein_coding	exon	9.68706	2.89303
ENSG00000189060.5:exon0001W00064	chr22	37806352	37806422	+	2	0.00117515	0.00322374	0.00527234	2.19978	2.50392	2.80806	ENSG00000189060.5	H1F0	protein_coding	exon	20.8842	2.96527
ENSG00000196365.11:exon0001W01413	chr19	5720083	5720153	-	2	0.00709566	0.0155545	0.0240134	2.10495	2.14337	2.18179	ENSG00000196365.11	LONP1	protein_coding	exon	16.2326	2.93019
ENSG00000197102.10:exon0046W03149	chr14	102027642	102027692	+	1	0.0195147	0.0195147	0.0195147	1.99609	1.99609	1.99609	ENSG00000197102.10	DYNC1H1	protein_coding	exon	7.32053	1.49458
ENSG00000197102.10:exon0073W04160	chr14	102047840	102047890	+	1	0.0465939	0.0465939	0.0465939	1.46303	1.46303	1.46303	ENSG00000197102.10	DYNC1H1	protein_coding	exon	8.03115	2.66666
ENSG00000197157.10:exon0001W00001	chr7	127652179	127652249	+	2	0.0204321	0.0299915	0.0395509	1.37769	1.47027	1.56284	ENSG00000197157.10	SND1	protein_coding	exon	29.1231	9.85838
ENSG00000197451.10:exon0001W00020	chr5	178204886	178204936	+	1	0.0387569	0.0387569	0.0387569	2.06942	2.06942	2.06942	ENSG00000197451.10	HNRNPAB	protein_coding	exon	6.33798	1.17208
ENSG00000197746.13:exon0015W00023	chr10	71816737	71816807	-	2	0.00510411	0.00682077	0.00853743	1.12699	1.1851	1.24321	ENSG00000197746.13	PSAP	protein_coding	exon	66.7001	28.7231
ENSG00000197746.13:exon0015W00053	chr10	71817337	71817387	-	1	0.0459485	0.0459485	0.0459485	1.02561	1.02561	1.02561	ENSG00000197746.13	PSAP	protein_coding	exon	32.8836	15.8974
ENSG00000198242.13:exon0004W00060	chr17	28720568	28720618	+	1	0.0284194	0.0284194	0.0284194	1.65956	1.65956	1.65956	ENSG00000198242.13	RPL23A	protein_coding	exon	13.1887	3.70335
ENSG00000198467.13:exon0001W00398	chr9	35689863	35689913	-	1	0.0465939	0.0465939	0.0465939	1.53749	1.53749	1.53749	ENSG00000198467.13	TPM2	protein_coding	exon	9.72133	2.99124
ENSG00000198467.13:exon0004W00177	chr9	35685453	35685503	-	1	0.0482851	0.0482851	0.0482851	1.4982	1.4982	1.4982	ENSG00000198467.13	TPM2	protein_coding	exon	11.1388	3.57936
ENSG00000198467.13:exon0005W00158	chr9	35685087	35685137	-	1	0.0140096	0.0140096	0.0140096	2.16064	2.16064	2.16064	ENSG00000198467.13	TPM2	protein_coding	exon	7.38986	1.35087
ENSG00000198561.12:exon0009W02172	chr11	57796716	57796786	+	2	0.0357749	0.0426515	0.0495282	1.69989	1.71262	1.72536	ENSG00000198561.12	CTNND1	protein_coding	exon	20.6075	5.71043
ENSG00000198830.10:exon0001W00005	chr1	26472529	26472579	+	1	0.0154726	0.0154726	0.0154726	1.3681	1.3681	1.3681	ENSG00000198830.10	HMGN2	protein_coding	exon	21.9028	8.08888
ENSG00000198900.5:exon0001W00002	chr20	41028837	41028887	+	1	0.00325552	0.00325552	0.00325552	2.22082	2.22082	2.22082	ENSG00000198900.5	TOP1	protein_coding	exon	7.80404	1.3137
ENSG00000198911.11:exon0024W03696	chr22	41907159	41907209	+	1	0.0347715	0.0347715	0.0347715	1.78058	1.78058	1.78058	ENSG00000198911.11	SREBF2	protein_coding	exon	7.81938	1.97824
ENSG00000198952.8:exon0021W00061	chr1	156250423	156250473	-	1	0.046583	0.046583	0.046583	1.63766	1.63766	1.63766	ENSG00000198952.8	SMG5	protein_coding	exon	9.94286	2.97361
ENSG00000199327.1:exon0001W00001	chr3	125119096	125119166	-	2	5.86e-09	1.21e-08	1.83e-08	3.97027	4.12413	4.278	ENSG00000199327.1	RNU6-230P	snRNA	exon	35.0133	0.910624
ENSG00000199731.1:exon0001W00002	chr5	32234785	32234855	-	2	0.0195147	0.0215122	0.0235096	1.94063	1.95642	1.97222	ENSG00000199731.1	RNU6-1079P	snRNA	exon	15.3487	3.15865
ENSG00000200246.1:exon0001W00001	chr8	32256495	32256585	+	3	6.17e-09	3.83e-07	1.12e-06	3.70914	3.77807	3.83167	ENSG00000200246.1	RNA5SP263	rRNA	exon	69.6232	3.2072
ENSG00000200434.1:exon0001W00003	chr16	34162998	34163088	+	3	3.56e-23	5.59e-22	1.31e-21	4.74941	4.92287	5.18379	ENSG00000200434.1	RNA5-8SP2	rRNA	exon	535.93	13.2908
ENSG00000200674.1:exon0001W00015	chr1	173791827	173791887	+	2	0.0391134	0.0391134	0.0391134	1.61444	1.61444	1.61444	ENSG00000200674.1	RN7SKP160	misc_RNA	exon	24.7765	7.21639
ENSG00000200779.1:exon0001W00002	chr2	71379774	71379844	-	2	6.32e-09	7.09e-09	7.86e-09	4.0643	4.0825	4.1007	ENSG00000200779.1	RNU6-105P	snRNA	exon	37.0547	1.09775
ENSG00000201390.1:exon0001W00001	chr10	21661634	21661704	-	2	5.5e-05	6.25e-05	7e-05	2.188	2.24834	2.30868	ENSG00000201390.1	RNU6-1141P	snRNA	exon	35.4163	6.50122
ENSG00000201428.1:exon0001W00007	chr12	112267196	112267326	+	5	1.85e-08	0.00501093	0.0248915	2.17611	3.61569	4.55383	ENSG00000201428.1	RN7SKP71	misc_RNA	exon	59.9223	2.35762
ENSG00000201517.1:exon0001W00001	chrX	48153979	48154069	-	3	1.36e-08	9.7e-07	2.66e-06	3.32361	3.54608	3.69826	ENSG00000201517.1	RNU6-707P	snRNA	exon	48.4745	2.78648
ENSG00000201583.1:exon0001W00009	chr9	105096915	105096985	+	2	1.97e-07	2.11e-07	2.26e-07	4.16616	4.17352	4.18088	ENSG00000201583.1	RN7SKP191	misc_RNA	exon	24.603	0.365916
ENSG00000201793.1:exon0001W00009	chr13	99205867	99205937	+	2	8.14e-06	1.16e-05	1.51e-05	3.05661	3.1545	3.2524	ENSG00000201793.1	RN7SKP9	misc_RNA	exon	23.9079	1.67754
ENSG00000202198.1:exon0001W00016	chr6	52995919	52995950	+	1	0.00170344	0.00170344	0.00170344	1.85936	1.85936	1.85936	ENSG00000202198.1	RN7SK	misc_RNA	exon	21.3505	5.39001
ENSG00000202347.1:exon0001W00001	chr13	113478914	113478984	-	2	4.62e-09	1.62e-08	2.77e-08	3.56889	3.84627	4.12365	ENSG00000202347.1	RNU1-16P	snRNA	exon	40.6954	1.75603
ENSG00000206754.1:exon0001W00001	chr6	132815306	132815376	+	2	0.0185822	0.0218529	0.0251235	1.88317	1.90501	1.92685	ENSG00000206754.1	SNORD101	snoRNA	exon	49.6245	11.3384
ENSG00000206965.1:exon0001W00003	chr2	174558005	174558072	-	2	0.00027423	0.000359108	0.000443986	1.97132	2.18558	2.39983	ENSG00000206965.1	RNU6-5P	snRNA	exon	25.0037	5.05422
ENSG00000207248.1:exon0001W00003	chr16	21642093	21642160	+	2	0.00352049	0.00431294	0.00510538	1.93627	1.98515	2.03402	ENSG00000207248.1	RNU6-1005P	snRNA	exon	20.4786	4.67067
ENSG00000207307.1:exon0001W00001	chr4	76532221	76532271	-	1	9.82e-05	9.82e-05	9.82e-05	3.41516	3.41516	3.41516	ENSG00000207307.1	RNU6-145P	snRNA	exon	6.75773	0.180875
ENSG00000209082.1:exon0001W00001	chrM	3229	3299	+	2	4.55e-05	0.00265065	0.00525579	1.37329	1.5955	1.81771	ENSG00000209082.1	MT-TL1	Mt_tRNA	exon	149.935	45.6202
ENSG00000210049.1:exon0001W00001	chrM	576	647	+	3	5.45e-07	0.00152896	0.00371564	1.39598	1.63842	1.97373	ENSG00000210049.1	MT-TF	Mt_tRNA	exon	310.951	103.394
ENSG00000210077.1:exon0001W00001	chrM	1601	1651	+	1	0.00212183	0.00212183	0.00212183	1.25578	1.25578	1.25578	ENSG00000210077.1	MT-TV	Mt_tRNA	exon	43.1777	17.3994
ENSG00000210100.1:exon0001W00001	chrM	4262	4331	+	2	0.0393621	0.0395434	0.0397248	1.04184	1.04354	1.04525	ENSG00000210100.1	MT-TI	Mt_tRNA	exon	306.906	144.915
ENSG00000210112.1:exon0001W00001	chrM	4401	4469	+	2	0.000267346	0.000378867	0.000490388	1.70545	1.73825	1.77104	ENSG00000210112.1	MT-TM	Mt_tRNA	exon	310.064	89.0674
ENSG00000210144.1:exon0001W00001	chrM	5825	5891	-	2	1.53e-08	2.93e-08	4.33e-08	2.04997	2.09319	2.13642	ENSG00000210144.1	MT-TY	Mt_tRNA	exon	606.68	135.614
ENSG00000210164.1:exon0001W00001	chrM	9990	10058	+	2	0.000117891	0.000901688	0.00168549	1.4283	1.53268	1.63705	ENSG00000210164.1	MT-TG	Mt_tRNA	exon	256.123	87.2014
ENSG00000210195.2:exon0001W00001	chrM	15887	15937	+	1	0.00982339	0.00982339	0.00982339	1.06787	1.06787	1.06787	ENSG00000210195.2	MT-TT	Mt_tRNA	exon	171.138	80.0648
ENSG00000210196.2:exon0001W00001	chrM	15955	16023	-	2	0.0106933	0.0108569	0.0110205	1.11465	1.11506	1.11547	ENSG00000210196.2	MT-TP	Mt_tRNA	exon	501.204	226.072
ENSG00000211450.9:exon0001W00027	chr11	57741769	57741859	+	3	0.00614115	0.0167201	0.0350011	1.48101	1.51807	1.58713	ENSG00000211450.9	C11orf31	protein_coding	exon	46.5116	15.3456
ENSG00000219481.10:exon0001W02560	chr1	16613497	16613547	-	1	0.0154718	0.0154718	0.0154718	2.05186	2.05186	2.05186	ENSG00000219481.10	NBPF1	protein_coding	exon	7.54744	1.49458
ENSG00000221955.10:exon0016W01820	chr3	125119088	125119144	-	2	5.86e-09	5.86e-09	5.86e-09	4.278	4.278	4.278	ENSG00000221955.10	SLC12A8	protein_coding	exon	35.6257	0.727666
ENSG00000221978.11:exon0014W00067	chr1	1387030	1387080	-	1	0.0193234	0.0193234	0.0193234	1.63158	1.63158	1.63158	ENSG00000221978.11	CCNL2	protein_coding	exon	11.1039	3.29194
ENSG00000222293.1:exon0001W00007	chr9	86423057	86423128	-	3	1.72e-09	1.04e-05	3.12e-05	3.8301	4.38829	4.67458	ENSG00000222293.1	RNU2-36P	snRNA	exon	47.7142	0.548874
ENSG00000222438.1:exon0001W00002	chr12	130869755	130869825	-	2	2.17e-05	2.72e-05	3.27e-05	3.78165	3.79524	3.80882	ENSG00000222438.1	RNU6-1077P	snRNA	exon	17.0024	0.365916
ENSG00000222923.1:exon0001W00001	chr2	114420124	114420194	+	2	4.79e-10	5.54e-10	6.29e-10	4.49075	4.63145	4.77215	ENSG00000222923.1	RNU2-41P	snRNA	exon	41.1534	0.548874
ENSG00000223075.1:exon0001W00004	chr1	192875745	192875815	-	2	0.000149277	0.000149277	0.000149277	3.62064	3.62064	3.62064	ENSG00000223075.1	RN7SKP126	misc_RNA	exon	15.5021	0.444411
ENSG00000228549.3:exon0001W00083	chr1	16872584	16872654	+	2	9.46e-18	2.22e-17	3.5e-17	4.21264	4.25031	4.28798	ENSG00000228549.3	RP11-108M9.3	lincRNA	exon	421.925	18.1414
ENSG00000237296.9:exon0010W01512	chr16	22467210	22467288	+	3	0.00518272	0.0187226	0.0439162	2.00585	2.22879	2.4036	ENSG00000237296.9	SMG1P1	transcribed_unprocessed_pseudogene	exon	25.1828	4.33794
ENSG00000238423.1:exon0001W00001	chr17	28720549	28720599	+	1	0.0303521	0.0303521	0.0303521	1.71235	1.71235	1.71235	ENSG00000238423.1	SNORD42B	snoRNA	exon	13.6975	3.74052
ENSG00000238795.1:exon0001W00011	chr12	6967536	6967586	-	1	0.0158992	0.0158992	0.0158992	1.13179	1.13179	1.13179	ENSG00000238795.1	SCARNA12	snoRNA	exon	45.8562	20.3688
ENSG00000238923.1:exon0001W00001	chr12	6943815	6943878	+	2	5.98e-14	1.01e-12	1.95e-12	3.27071	3.41257	3.55444	ENSG00000238923.1	RNU7-1	snRNA	exon	81.4345	6.78221
ENSG00000239306.4:exon0002W00034	chr11	66617228	66617298	+	2	0.0012234	0.00930477	0.0173861	1.91357	2.1592	2.40482	ENSG00000239306.4	RBM14	protein_coding	exon	17.7495	3.15448
ENSG00000239306.4:exon0007W00412	chr11	66624813	66624863	+	1	0.0412119	0.0412119	0.0412119	1.60418	1.60418	1.60418	ENSG00000239306.4	RBM14	protein_coding	exon	9.04777	2.66666
ENSG00000239306.4:exon0007W00436	chr11	66625293	66625363	+	2	0.0188179	0.0190043	0.0191907	1.61986	1.78485	1.94983	ENSG00000239306.4	RBM14	protein_coding	exon	19.9162	5.28268
ENSG00000242294.6:exon0010W00779	chr7	100351631	100351701	+	2	0.00135476	0.00222757	0.00310038	2.16645	2.37141	2.57636	ENSG00000242294.6	STAG3L5P	transcribed_unprocessed_pseudogene	exon	18.5432	2.8517
ENSG00000245532.5:exon0001W00051	chr11	65423773	65423843	+	2	0.0104135	0.0119968	0.0135801	1.38633	1.41277	1.43921	ENSG00000245532.5	NEAT1	lincRNA	exon	61.2895	21.8983
ENSG00000245532.5:exon0001W00229	chr11	65427333	65427383	+	1	0.0193063	0.0193063	0.0193063	1.62615	1.62615	1.62615	ENSG00000245532.5	NEAT1	lincRNA	exon	7.09819	2.0609
ENSG00000251562.7:exon0001W00324	chr11	65504221	65504291	+	2	0.0106933	0.0122857	0.0138782	1.14002	1.21147	1.28292	ENSG00000251562.7	MALAT1	lincRNA	exon	105.984	43.9921
ENSG00000251920.1:exon0001W00004	chr6	125979871	125979934	-	2	2.76e-17	5.17e-07	1.03e-06	4.49521	4.85724	5.21926	ENSG00000251920.1	RNA5SP216	rRNA	exon	98.922	1.43353
ENSG00000252623.1:exon0001W00003	chr20	32008390	32008440	+	1	6.09e-07	6.09e-07	6.09e-07	3.52757	3.52757	3.52757	ENSG00000252623.1	RNA5SP481	rRNA	exon	14.7357	0.808244
ENSG00000252744.1:exon0001W00004	chr1	148330330	148330394	+	2	4.25e-11	5.04e-11	5.84e-11	4.40837	4.42092	4.43348	ENSG00000252744.1	Y_RNA	misc_RNA	exon	49.3722	1.09358
ENSG00000253729.7:exon0047W04319	chr8	47859610	47859660	-	1	0.0321817	0.0321817	0.0321817	1.76393	1.76393	1.76393	ENSG00000253729.7	PRKDC	protein_coding	exon	7.76538	1.94732
ENSG00000254413.8:exon0001W00682	chr22	50582508	50582558	-	1	0.00414722	0.00414722	0.00414722	2.04706	2.04706	2.04706	ENSG00000254413.8	CHKB-CPT1B	protein_coding	exon	8.72283	1.84078
ENSG00000254911.3:exon0001W00010	chr11	93721692	93721802	+	4	7.05e-05	0.00194651	0.0069563	1.73024	2.09166	2.36035	ENSG00000254911.3	SCARNA9	antisense	exon	60.2417	12.8712
ENSG00000256028.2:exon0005W00269	chr12	122980692	122980742	+	1	0.0327349	0.0327349	0.0327349	1.72238	1.72238	1.72238	ENSG00000256028.2	RP11-197N18.2	processed_transcript	exon	6.02102	1.53591
ENSG00000259784.1:exon0001W00010	chr16	2514144	2514182	+	1	0.00632218	0.00632218	0.00632218	2.77507	2.77507	2.77507	ENSG00000259784.1	RP11-20I23.3	protein_coding	exon	6.27861	0.583956
ENSG00000260464.1:exon0001W00021	chr1	93847573	93847623	+	1	0.000101762	0.000101762	0.000101762	2.3107	2.3107	2.3107	ENSG00000260464.1	RP4-561L24.3	lincRNA	exon	50.0487	9.03745
ENSG00000262814.6:exon0001W00009	chr17	81703516	81703566	+	1	0.0318208	0.0318208	0.0318208	1.74211	1.74211	1.74211	ENSG00000262814.6	MRPL12	protein_coding	exon	8.18037	2.08478
ENSG00000263001.5:exon0001W00009	chr7	74657826	74657876	+	1	0.0397038	0.0397038	0.0397038	1.82516	1.82516	1.82516	ENSG00000263001.5	GTF2I	protein_coding	exon	8.75789	2.1282
ENSG00000264364.2:exon0003W00368	chr17	58090761	58090811	+	1	0.0475434	0.0475434	0.0475434	1.58217	1.58217	1.58217	ENSG00000264364.2	DYNLL2	protein_coding	exon	6.09035	1.63412
ENSG00000265072.1:exon0001W00001	chr12	103930424	103930494	+	2	0.00444196	0.0104009	0.0163599	1.50266	1.59186	1.68107	ENSG00000265072.1	MIR3652	miRNA	exon	162.58	51.1058
ENSG00000266173.5:exon0014W00173	chr17	63706271	63706361	-	3	2.37e-14	2.85e-14	3.54e-14	4.89746	4.97498	5.12905	ENSG00000266173.5	STRADA	protein_coding	exon	104.171	1.4595
ENSG00000267322.2:exon0001W00001	chr18	49814022	49814172	+	6	4.64e-10	0.000215104	0.000642999	1.60334	1.89924	2.19896	ENSG00000267322.2	SNHG22	antisense	exon	255.719	69.2564
ENSG00000268643.1:exon0001W01026	chr19	42255077	42255127	-	1	0.0211597	0.0211597	0.0211597	1.82351	1.82351	1.82351	ENSG00000268643.1	AC006486.9	protein_coding	exon	7.40879	1.83661
ENSG00000269028.3:exon0001W00039	chr3	96617947	96618057	-	4	6.56e-06	0.00019177	0.000589521	1.77278	2.18374	3.03325	ENSG00000269028.3	MTRNR2L12	protein_coding	exon	106.898	24.8165
ENSG00000269821.1:exon0001W04022	chr11	2688747	2688837	-	3	0.00219038	0.0110361	0.0184297	2.32269	2.61338	2.94184	ENSG00000269821.1	KCNQ1OT1	antisense	exon	17.2795	1.7602
ENSG00000278249.1:exon0001W00001	chr1	109100192	109100382	+	7	7.18e-12	0.000738207	0.00516219	1.17015	1.54889	1.84229	ENSG00000278249.1	SCARNA2	scaRNA	exon	1398.05	487.306
ENSG00000278249.1:exon0001W00011	chr1	109100392	109100522	+	5	0.000806372	0.00591758	0.0131567	1.11667	1.225	1.33824	ENSG00000278249.1	SCARNA2	scaRNA	exon	167.898	70.4368
ENSG00000281621.1:exon0001W00001	chr9	74847505	74847601	+	4	3.18e-11	1.37e-05	5.36e-05	3.95489	4.06955	4.23921	ENSG00000281621.1	Y_RNA	misc_RNA	exon	67.1864	1.63829
